# Supplementary material for: New Secondary Metabolites from the Marine-Derived Fungus Talaromyces mangshanicus BTBU20211089
Source: MDPI journal article supplement (doi:10.3390/md20020079), 2022-01-18
Supplement: s1 [file s1]

## SUPPLEMENTARY MATERIAL

### New Secondary Metabolites the Marine-derived Fungus *Talaromyces mangshanicus* BTBU20211089

Kai Zhang <sup>1,†</sup>, Xinwan Zhang <sup>2,†</sup>, Rui Lin <sup>2</sup>, Haijin Yang <sup>2</sup>, Fuhang Song <sup>1,\*</sup>, Xiuli Xu <sup>2,\*</sup> and Long Wang <sup>3,\*</sup>

<sup>1</sup> School of Light Industry, Beijing Technology and Business University, Beijing 100048, China; zhangkai2030302071@st.btbu.edu.cn

<sup>2</sup> School of Ocean Sciences, China University of Geosciences, Beijing 100083, China; zhangxinwan@cugb.edu.cn (X.Z.); linrui520@126.com (R.L.); yanghaijin52@163.com (H.Y.)

<sup>3</sup> Key Laboratory of Mycology, Institute of Microbiology, Chinese Academy of Sciences, Beijing 100101, China

\* Correspondence: songfuhang@btbu.edu.cn (F.S.); xuxl@cugb.edu.cn (X.X.); wl\_dgk@im.ac.cn (L.W.)

<sup>†</sup> These authors contributed equally to this work.

## Table of Contents

|                                                                                                             |    |
|-------------------------------------------------------------------------------------------------------------|----|
| <b>Figure S1.</b> HRESIMS spectrum for <b>1</b> .....                                                       | 4  |
| <b>Figure S2.</b> $^1\text{H}$ NMR spectrum (500 MHz, $\text{DMSO-}d_6$ ) of <b>1</b> .....                 | 4  |
| <b>Figure S3.</b> $^{13}\text{C}$ NMR spectrum (125 MHz, $\text{DMSO-}d_6$ ) of <b>1</b> .....              | 5  |
| <b>Figure S4.</b> HSQC spectrum (500 MHz, $\text{DMSO-}d_6$ ) of <b>1</b> .....                             | 5  |
| <b>Figure S5.</b> $^1\text{H}$ - $^1\text{H}$ COSY spectrum (500 MHz, $\text{DMSO-}d_6$ ) of <b>1</b> ..... | 6  |
| <b>Figure S6.</b> HMBC spectrum (500 MHz, $\text{DMSO-}d_6$ ) of <b>1</b> .....                             | 6  |
| <b>Figure S7.</b> ROESY spectrum (500 MHz, $\text{DMSO-}d_6$ ) of <b>1</b> .....                            | 7  |
| <b>Figure S8.</b> HRESIMS spectrum for <b>2</b> .....                                                       | 7  |
| <b>Figure S9.</b> $^1\text{H}$ NMR spectrum (500 MHz, $\text{DMSO-}d_6$ ) of <b>2</b> .....                 | 8  |
| <b>Figure S10.</b> $^{13}\text{C}$ NMR spectrum (125 MHz, $\text{DMSO-}d_6$ ) of <b>2</b> .....             | 8  |
| <b>Figure S11.</b> HSQC spectrum (500 MHz, $\text{DMSO-}d_6$ ) of <b>2</b> .....                            | 9  |
| <b>Figure S12.</b> $^1\text{H}$ - $^1\text{H}$ COSY spectrum (500MHz, $\text{DMSO-}d_6$ ) of <b>2</b> ..... | 9  |
| <b>Figure S13.</b> HMBC spectrum (500MHz, $\text{DMSO}$ ) of <b>2</b> .....                                 | 10 |
| <b>Figure S14.</b> ROESY spectrum (500MHz, $\text{DMSO}$ ) of <b>2</b> .....                                | 10 |
| <b>Figure S15.</b> HRESIMS spectrum for <b>3</b> .....                                                      | 11 |
| <b>Figure S16.</b> $^1\text{H}$ NMR spectrum (500 MHz, $\text{DMSO-}d_6$ ) of <b>3</b> .....                | 11 |
| <b>Figure S17.</b> $^{13}\text{C}$ NMR spectrum (125 MHz, $\text{DMSO-}d_6$ ) of <b>3</b> .....             | 12 |
| <b>Figure S18.</b> HSQC spectrum (500 MHz, $\text{DMSO-}d_6$ ) of <b>3</b> .....                            | 12 |
| <b>Figure S19.</b> HMBC spectrum (500 MHz, $\text{DMSO-}d_6$ ) of <b>3</b> .....                            | 13 |
| <b>Figure S20.</b> ROESY spectrum (500 MHz, $\text{DMSO-}d_6$ ) of <b>3</b> .....                           | 13 |
| <b>Figure S21.</b> HRESIMS spectrum for <b>4</b> .....                                                      | 14 |
| <b>Figure S22.</b> $^1\text{H}$ NMR spectrum (500 MHz, $\text{DMSO-}d_6$ ) of <b>4</b> .....                | 14 |
| <b>Figure S23.</b> $^{13}\text{C}$ NMR spectrum (125 MHz, $\text{DMSO-}d_6$ ) of <b>4</b> .....             | 15 |
| <b>Figure S24.</b> HSQC spectrum (500 MHz, $\text{DMSO-}d_6$ ) of <b>4</b> .....                            | 15 |
| <b>Figure S25.</b> HMBC spectrum (500 MHz, $\text{DMSO-}d_6$ ) of <b>4</b> .....                            | 16 |
| <b>Figure S26.</b> ROESY spectrum (500 MHz, $\text{DMSO-}d_6$ ) of <b>4</b> .....                           | 16 |
| <b>Figure S27.</b> HRESIMS spectrum for <b>5</b> .....                                                      | 17 |
| <b>Figure S28.</b> $^1\text{H}$ NMR spectrum (500 MHz, $\text{DMSO-}d_6$ ) of <b>5</b> .....                | 17 |
| <b>Figure S29.</b> $^{13}\text{C}$ NMR spectrum (125 MHz, $\text{DMSO-}d_6$ ) of <b>5</b> .....             | 18 |
| <b>Figure S30.</b> HSQC spectrum (500 MHz, $\text{DMSO-}d_6$ ) of <b>5</b> .....                            | 18 |

|                                                                                                        |    |
|--------------------------------------------------------------------------------------------------------|----|
| <b>Figure S31.</b> $^1\text{H}$ - $^1\text{H}$ COSY spectrum (500 MHz, DMSO- $d_6$ ) of <b>5</b> ..... | 19 |
| <b>Figure S32.</b> HMBC spectrum (500 MHz, DMSO- $d_6$ ) of <b>5</b> .....                             | 19 |
| <b>Figure S33.</b> HRESIMS spectrum for <b>6</b> .....                                                 | 20 |
| <b>Figure S34.</b> $^1\text{H}$ NMR spectrum (500 MHz, DMSO- $d_6$ ) of <b>6</b> .....                 | 20 |
| <b>Figure S35.</b> $^{13}\text{C}$ NMR spectrum (125 MHz, DMSO- $d_6$ ) of <b>6</b> .....              | 21 |
| <b>Figure S36.</b> HSQC spectrum (500 MHz, DMSO- $d_6$ ) of <b>6</b> .....                             | 21 |
| <b>Figure S37.</b> HMBC spectrum (500 MHz, DMSO- $d_6$ ) of <b>6</b> .....                             | 22 |
| <b>Figure S38.</b> HRESIMS spectrum for <b>7</b> .....                                                 | 22 |
| <b>Figure S39.</b> $^1\text{H}$ NMR spectrum (500 MHz, DMSO- $d_6$ ) of <b>7</b> .....                 | 23 |
| <b>Figure S40.</b> $^{13}\text{C}$ NMR spectrum (125 MHz, DMSO- $d_6$ ) of <b>7</b> .....              | 23 |
| <b>Figure S41.</b> HSQC spectrum (500 MHz, DMSO- $d_6$ ) of <b>7</b> .....                             | 24 |
| <b>Figure S42.</b> $^1\text{H}$ - $^1\text{H}$ COSY spectrum (500 MHz, DMSO- $d_6$ ) of <b>7</b> ..... | 24 |
| <b>Figure S43.</b> HMBC spectrum (500 MHz, DMSO- $d_6$ ) of <b>7</b> .....                             | 25 |
| <b>Figure S44.</b> ROESY spectrum (500 MHz, DMSO- $d_6$ ) of <b>7</b> .....                            | 25 |
| <b>Figure S45.</b> Neighbor-joining phylogenetic tree of strain BTBU20211089 .....                     | 26 |

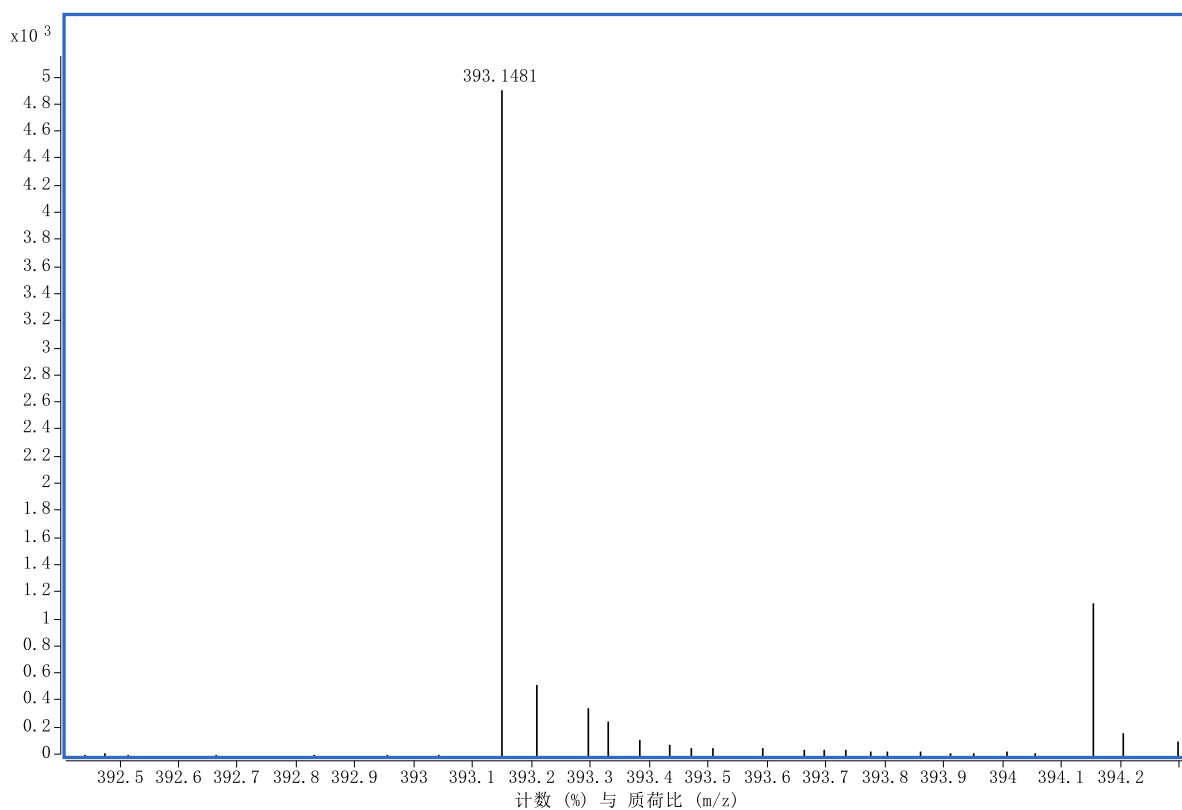

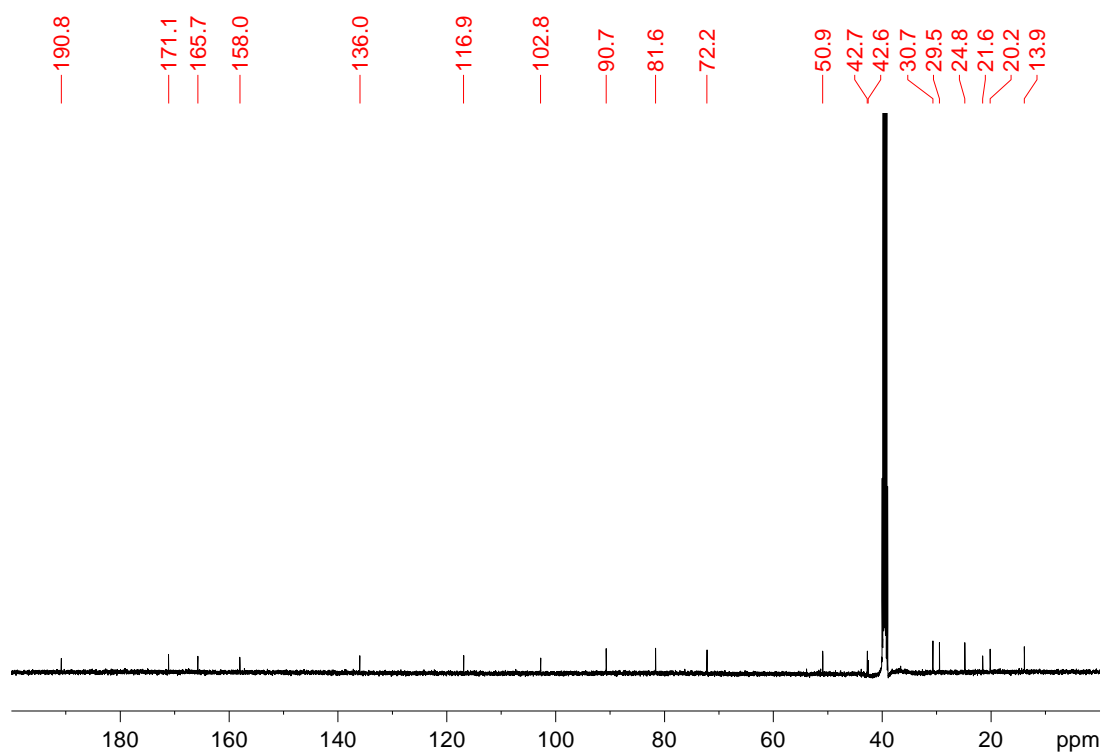

**Figure S3.**  $^{13}\text{C}$  NMR spectrum (125 MHz,  $\text{DMSO}-d_6$ ) of **1**

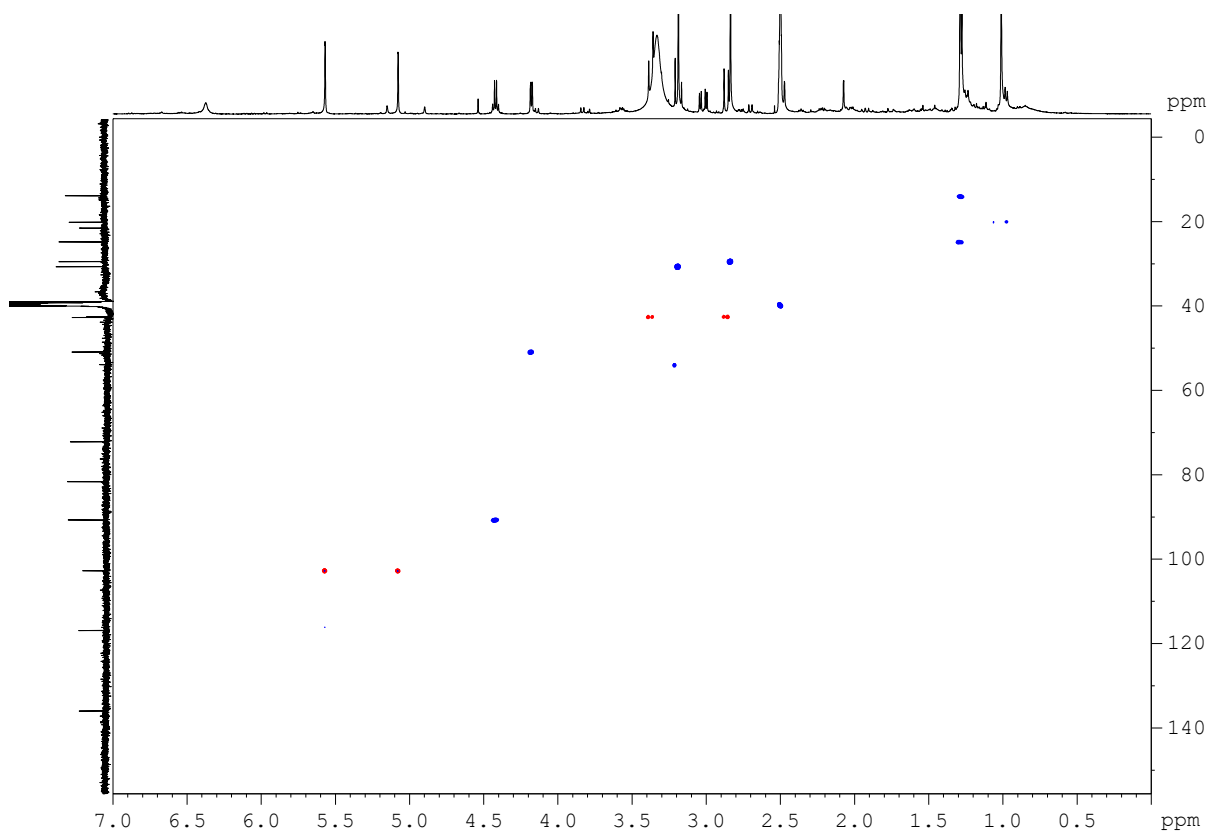

**Figure S4.** HSQC spectrum (500 MHz,  $\text{DMSO}-d_6$ ) of **1**

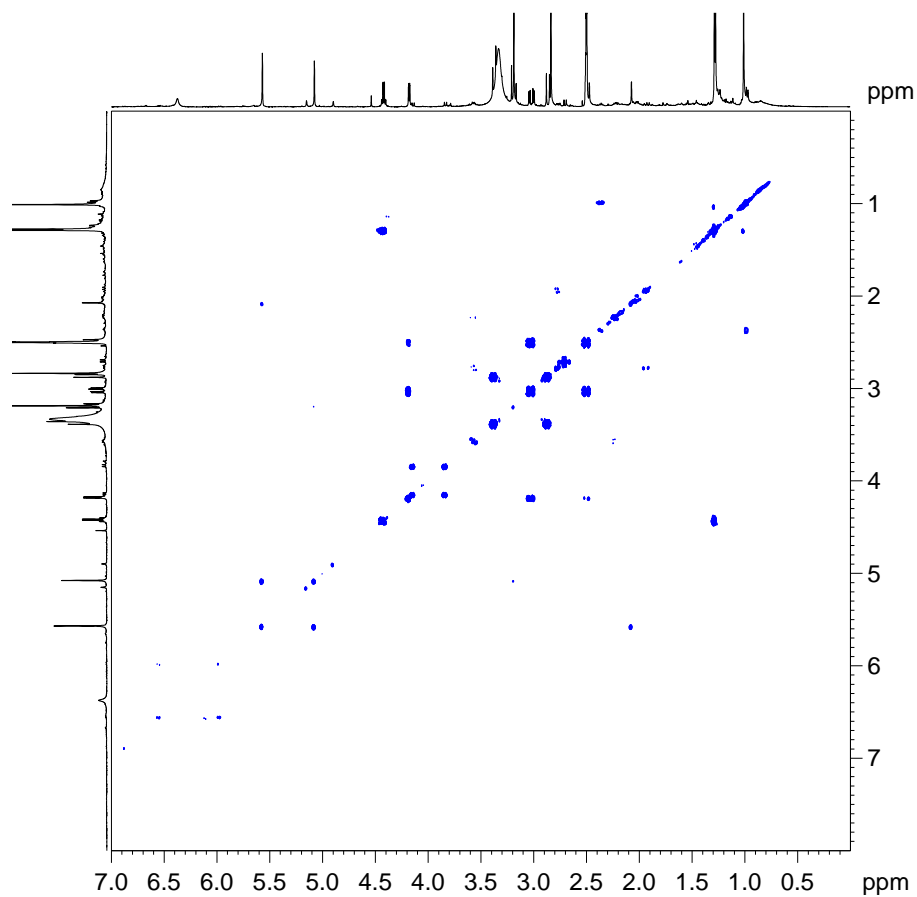

**Figure S5.**  $^1\text{H}$ - $^1\text{H}$  COSY spectrum (500 MHz,  $\text{DMSO}-d_6$ ) of **1**

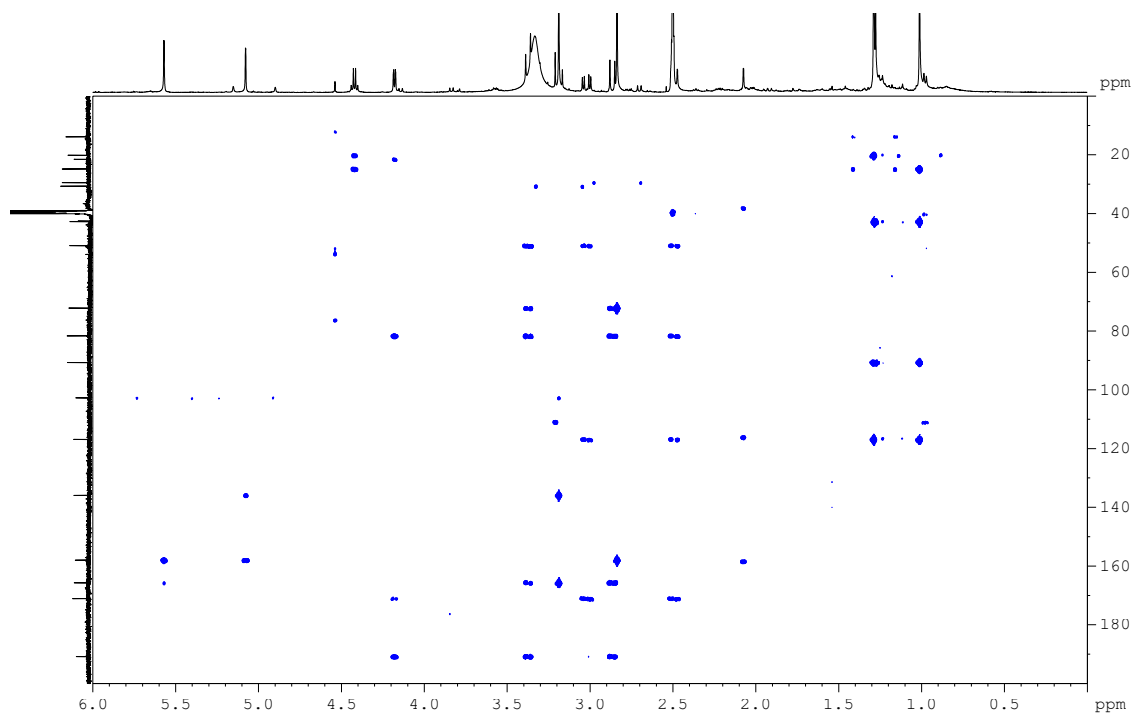

**Figure S6.** HMBC spectrum (500 MHz,  $\text{DMSO}-d_6$ ) of **1**

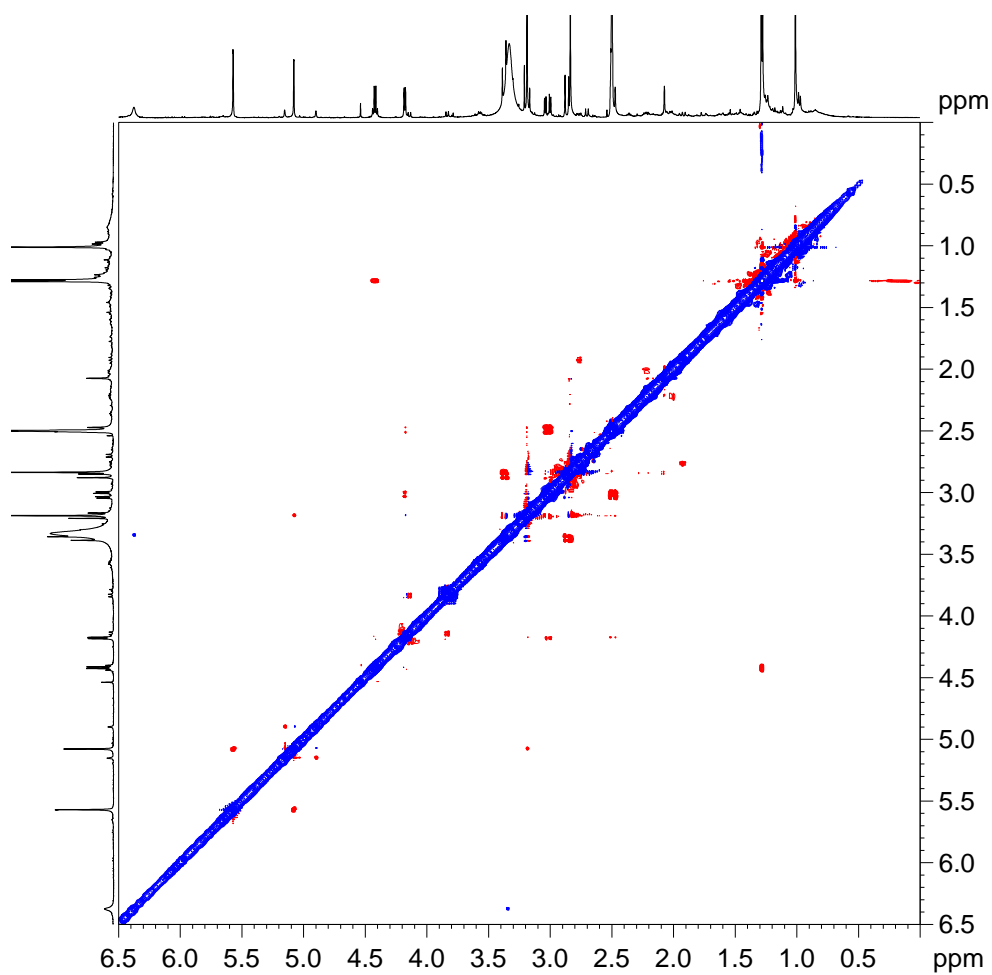

**Figure S7.** ROESY spectrum (500 MHz, DMSO- $d_6$ ) of **1**

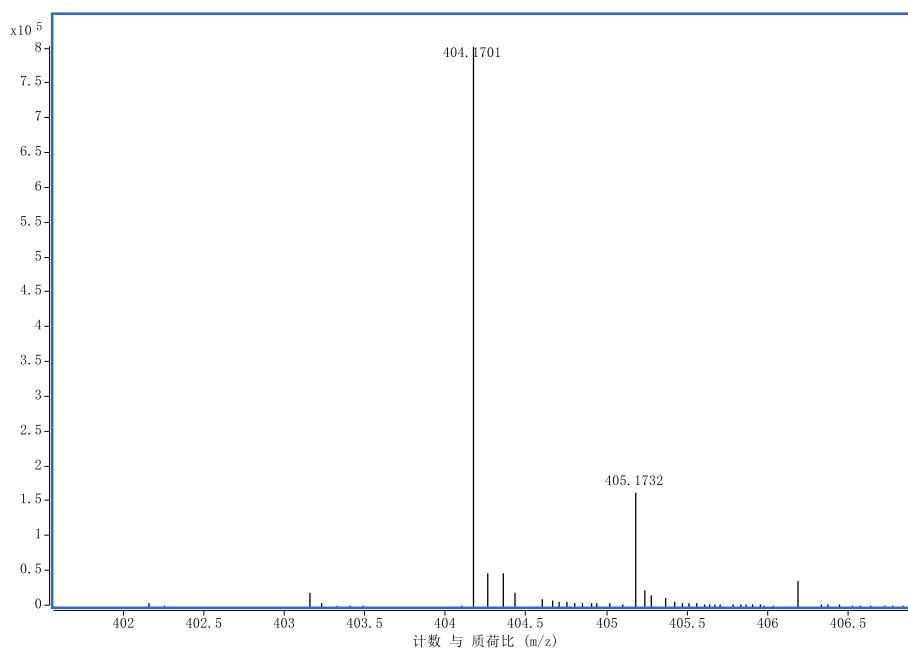

**Figure S8.** HRESIMS spectrum for **2**

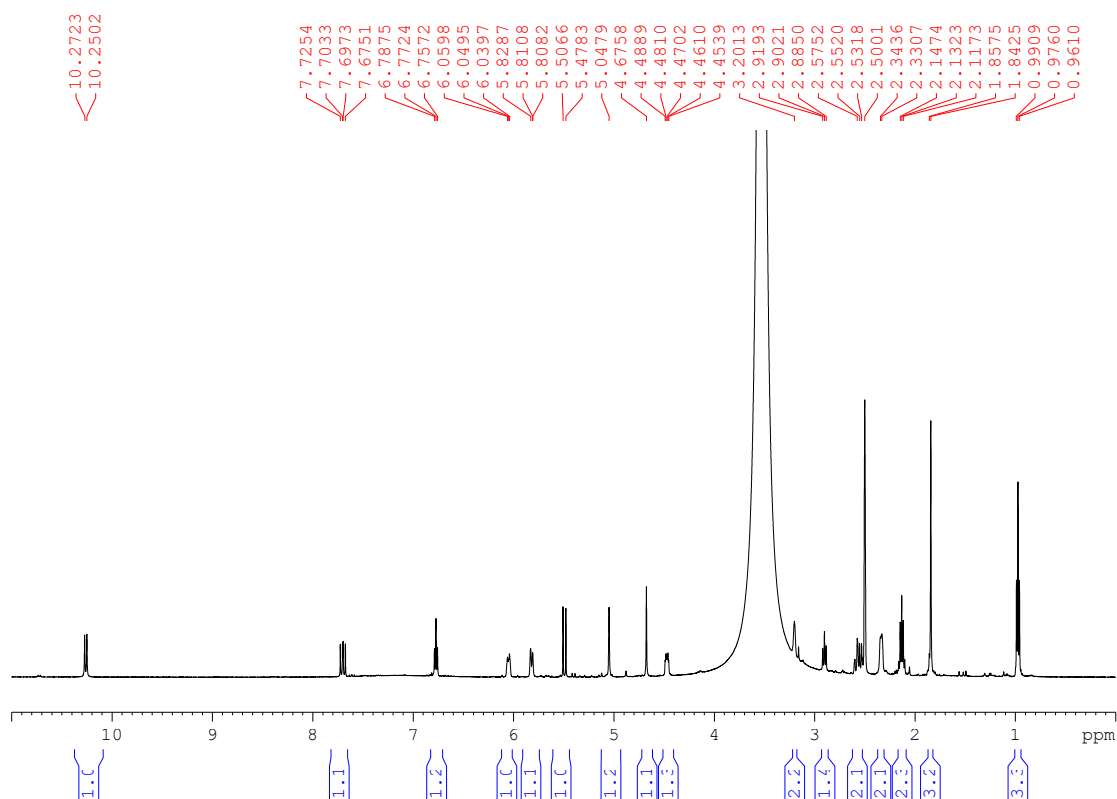

**Figure S9.** <sup>1</sup>H NMR spectrum (500 MHz, DMSO-*d*<sub>6</sub>) of **2**

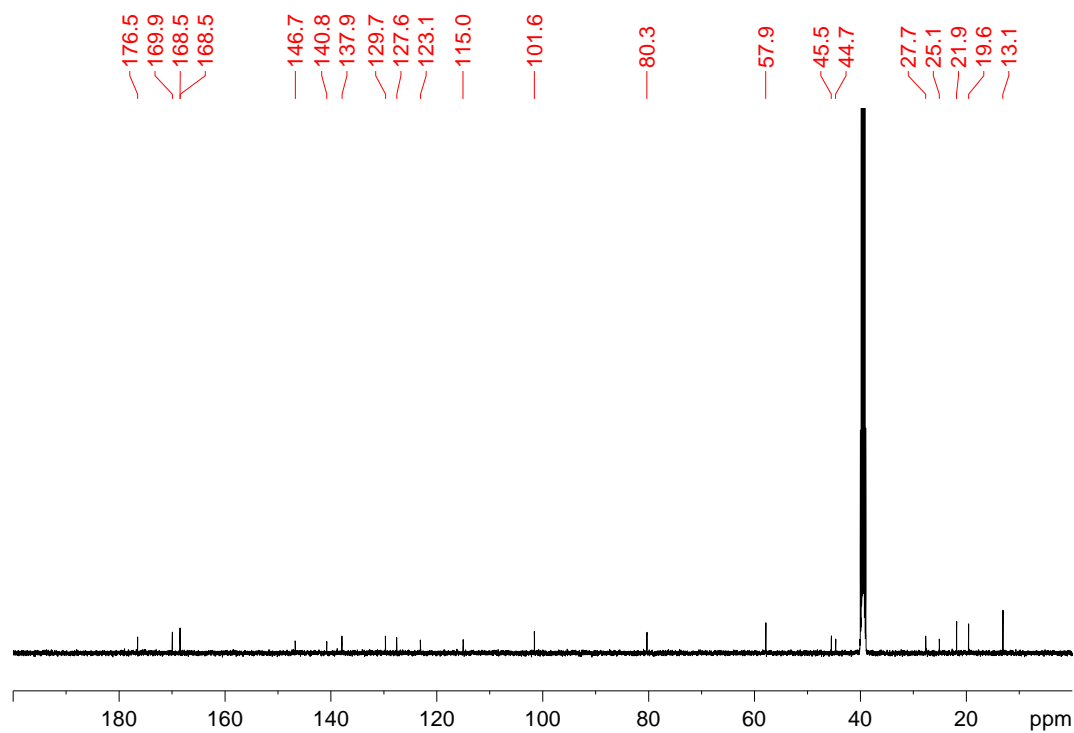

**Figure S10.** <sup>13</sup>C NMR spectrum (125 MHz, DMSO-*d*<sub>6</sub>) of **2**

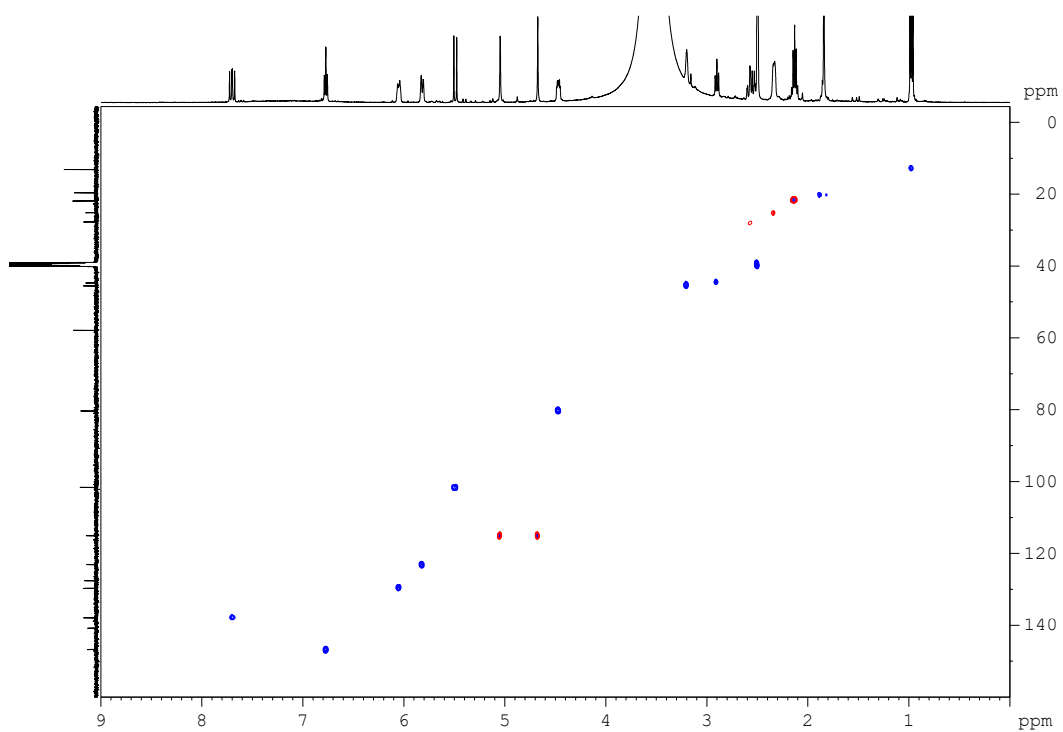

**Figure S11.** HSQC spectrum (500 MHz, DMSO- $d_6$ ) of **2**

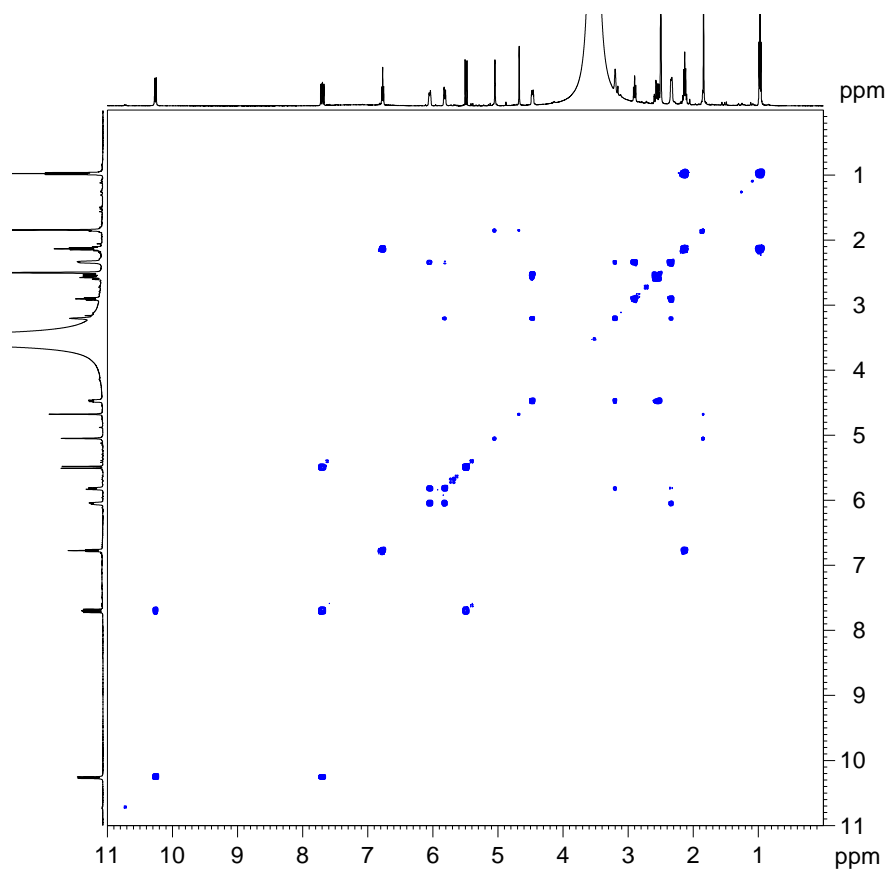

**Figure S12.**  $^1\text{H}$ - $^1\text{H}$  COSY spectrum (500 MHz, DMSO- $d_6$ ) of **2**

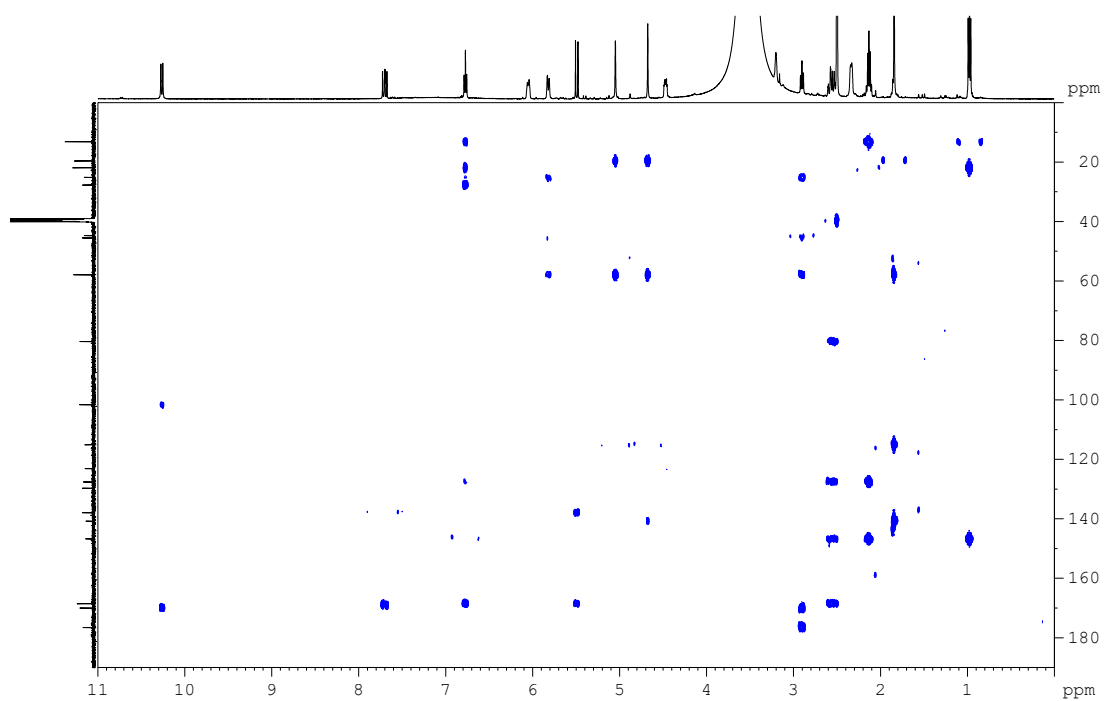

**Figure S13.** HMBC spectrum (500 MHz, DMSO- $d_6$ ) of **2**

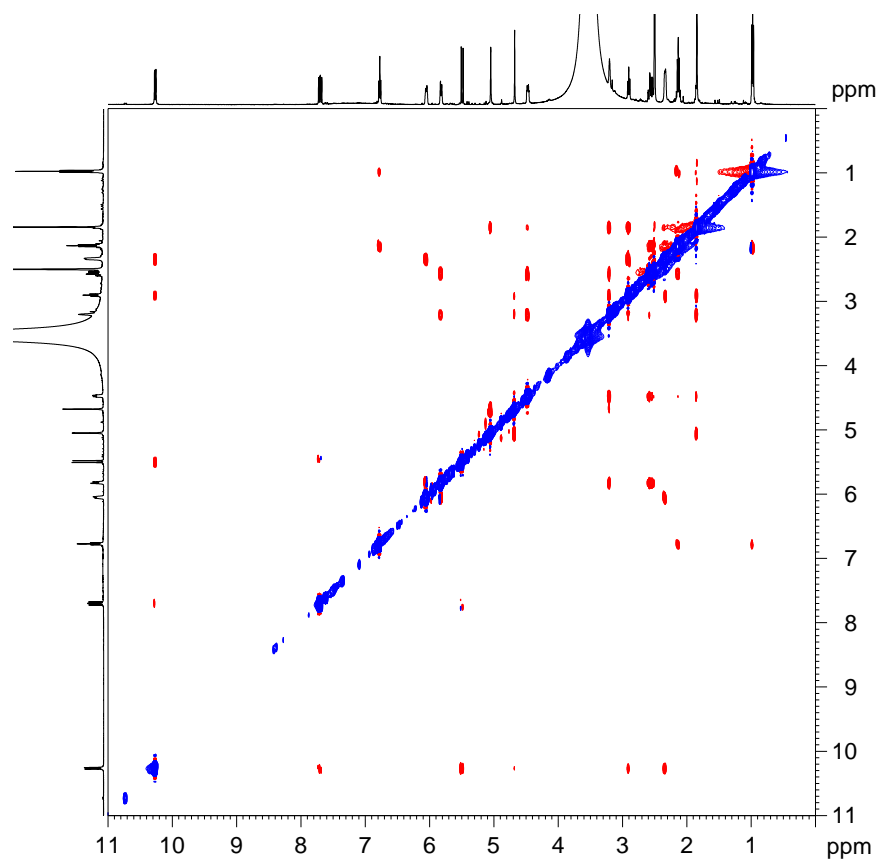

**Figure S14.** ROESY spectrum (500 MHz, DMSO- $d_6$ ) of **2**



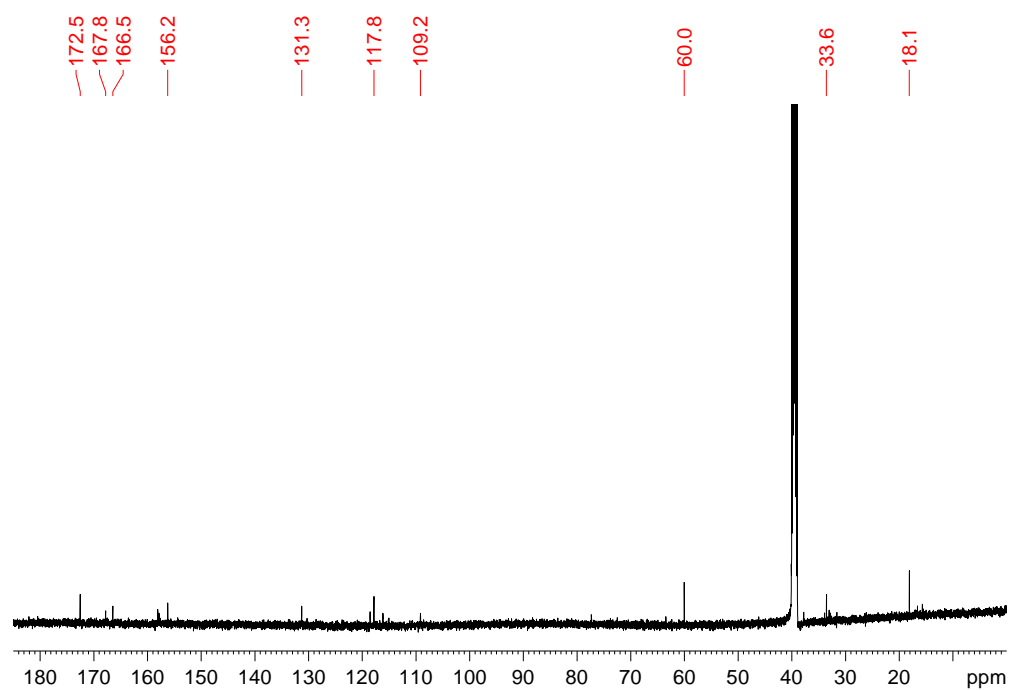

**Figure S17.** <sup>13</sup>C NMR spectrum (125 MHz, DMSO-*d*<sub>6</sub>) of **3**

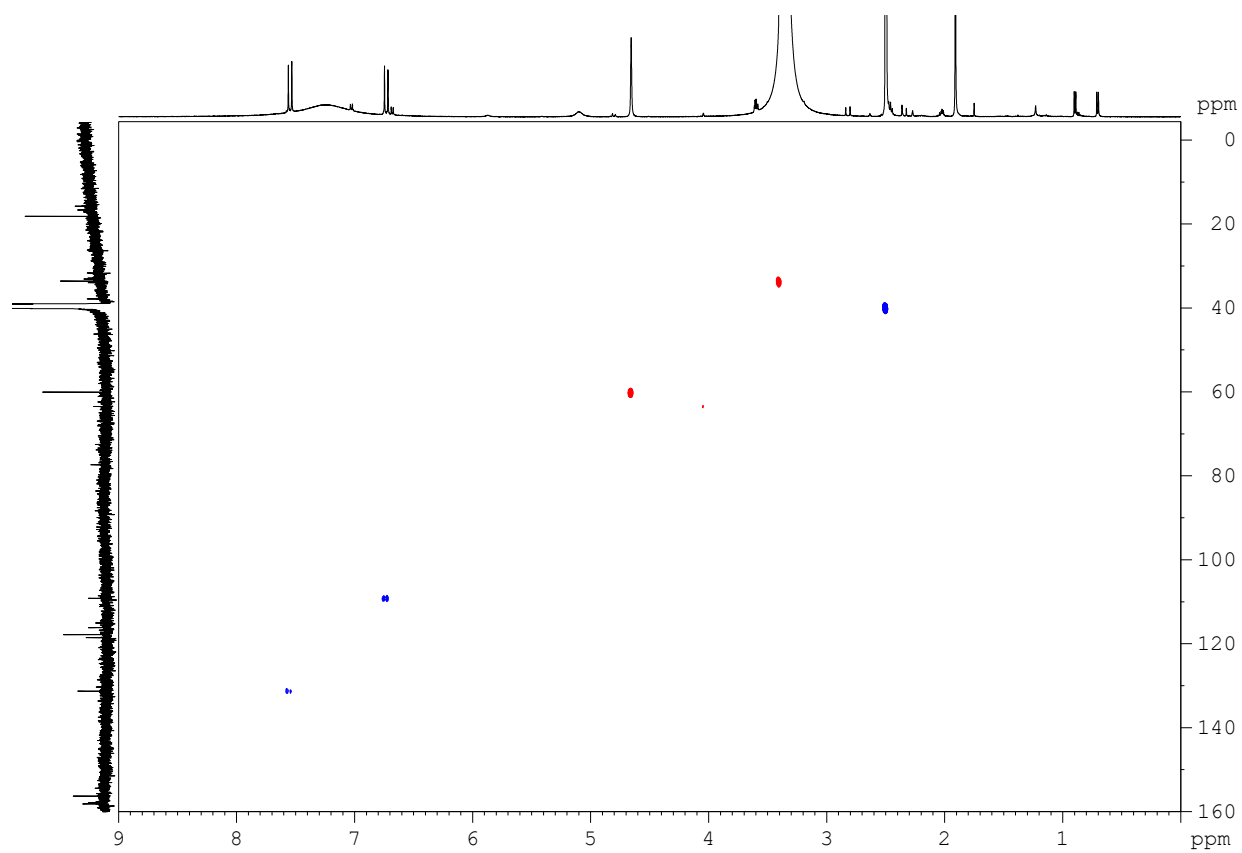

**Figure S18.** HSQC spectrum (500 MHz, DMSO-*d*<sub>6</sub>) of **3**

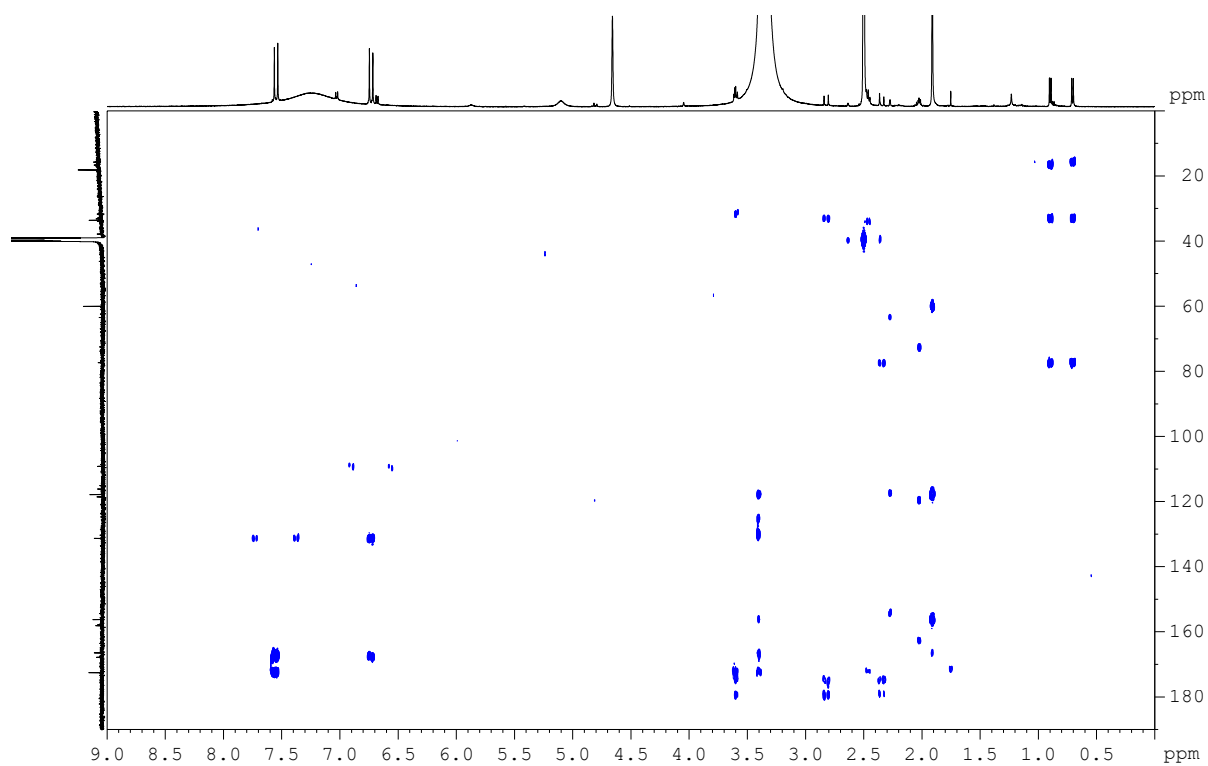

**Figure S19.** HMBC spectrum (500 MHz, DMSO- $d_6$ ) of **3**

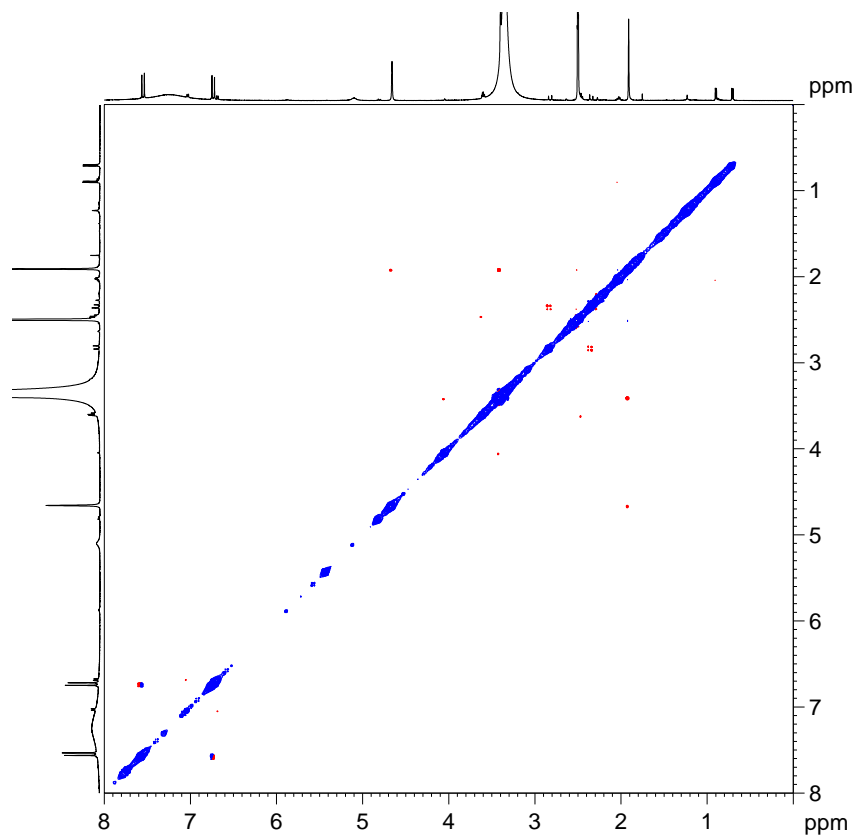

**Figure S20.** ROESY spectrum (500 MHz, DMSO- $d_6$ ) of **3**

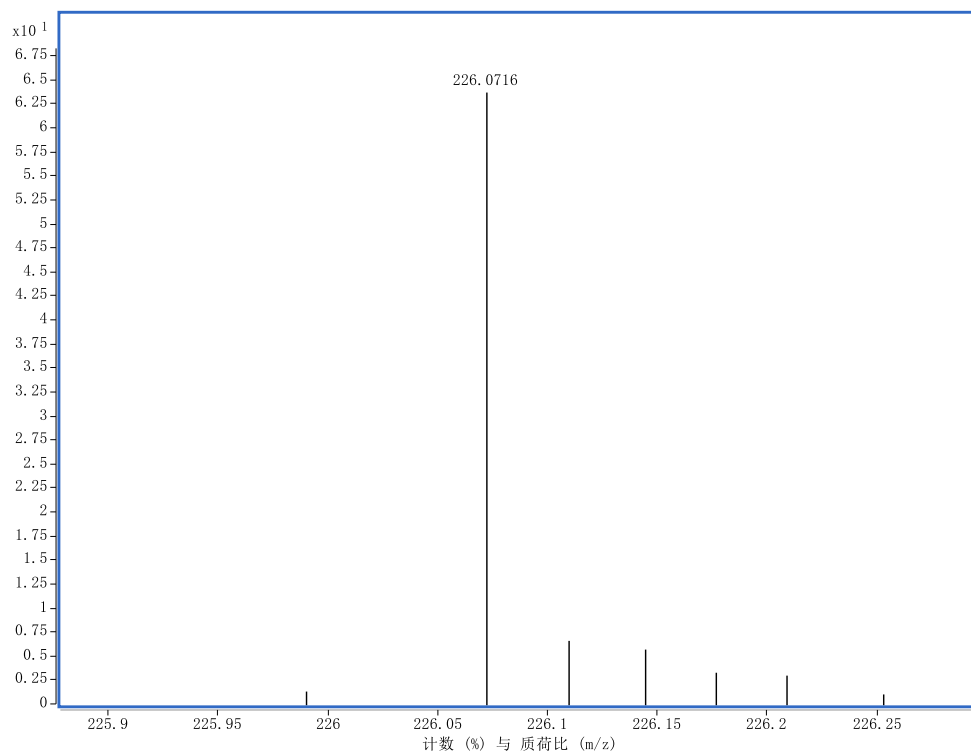**Figure S21.** HRESIMS spectrum for **4**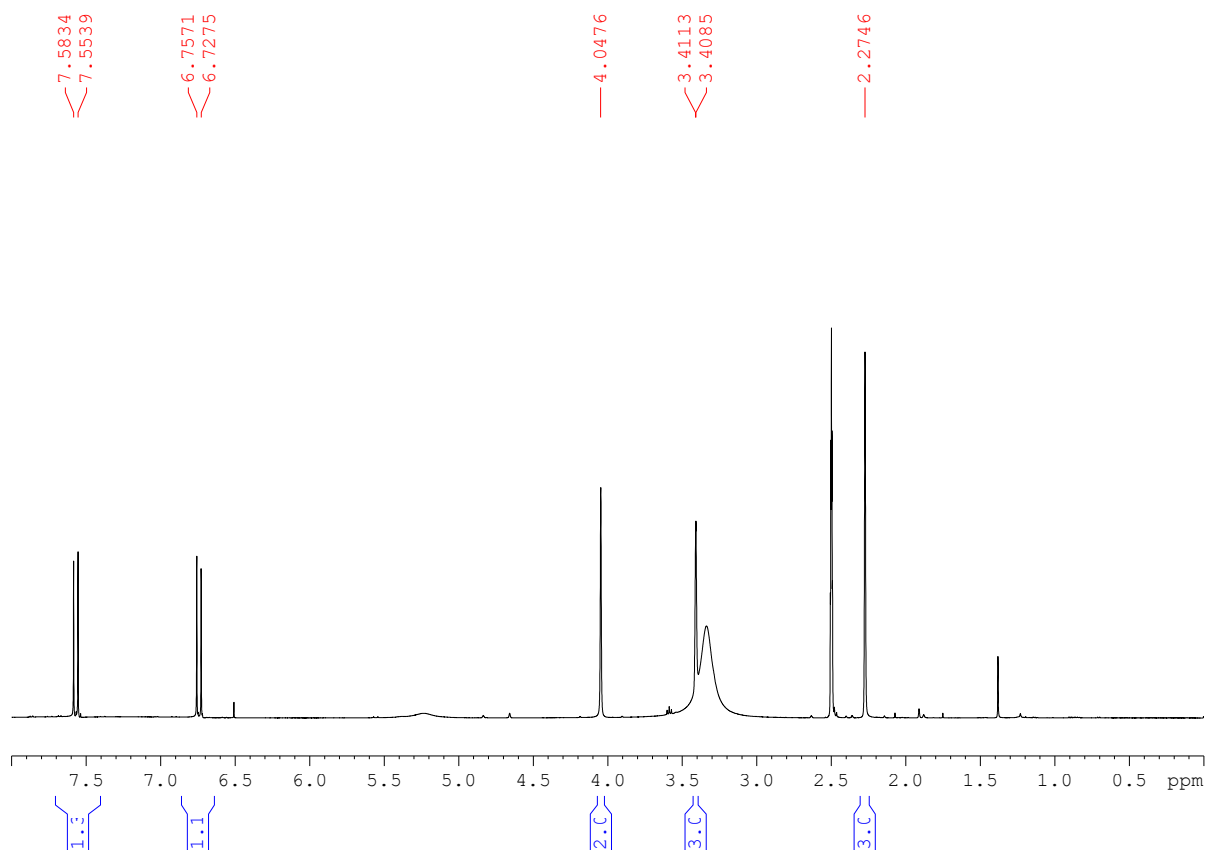**Figure S22.** <sup>1</sup>H NMR spectrum (500 MHz, DMSO-*d*<sub>6</sub>) of **4**

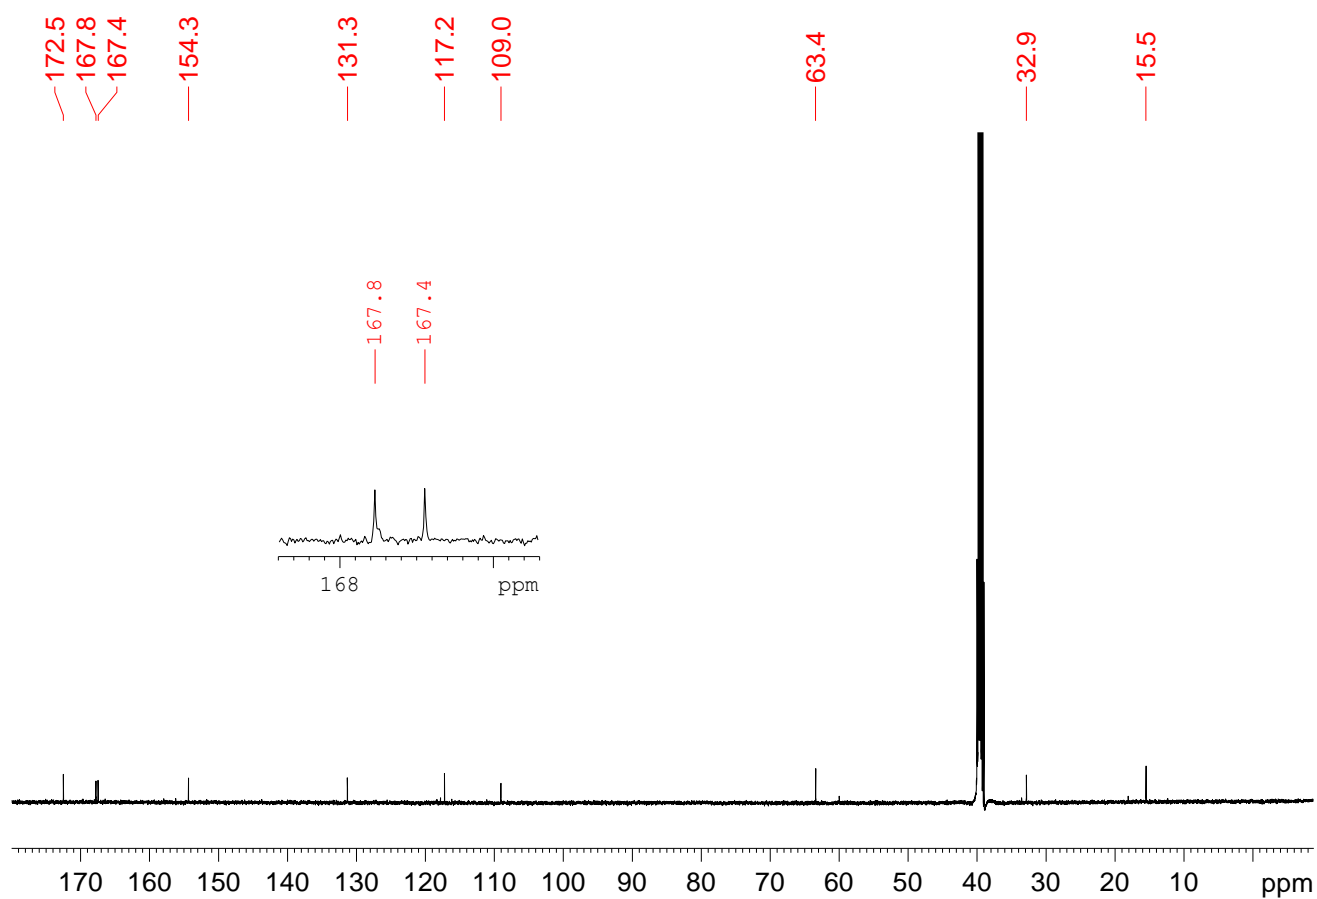

**Figure S23.** <sup>13</sup>C NMR spectrum (125 MHz, DMSO-*d*<sub>6</sub>) of **4**

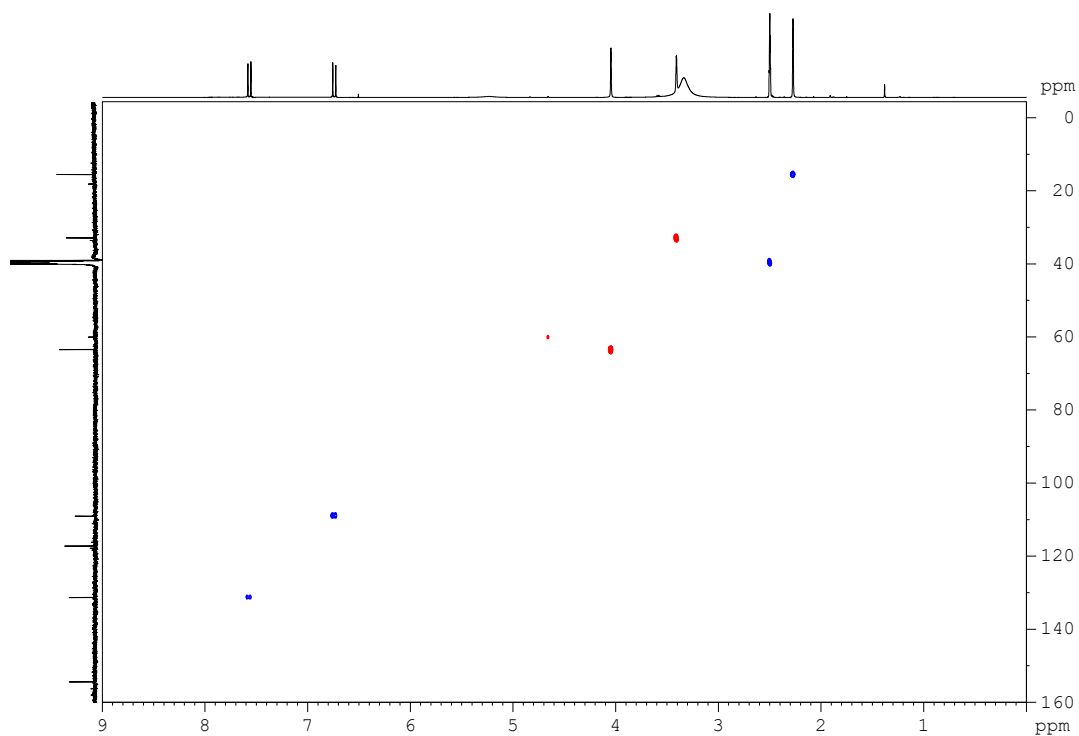

**Figure S24.** HSQC spectrum (500 MHz, DMSO-*d*<sub>6</sub>) of **4**

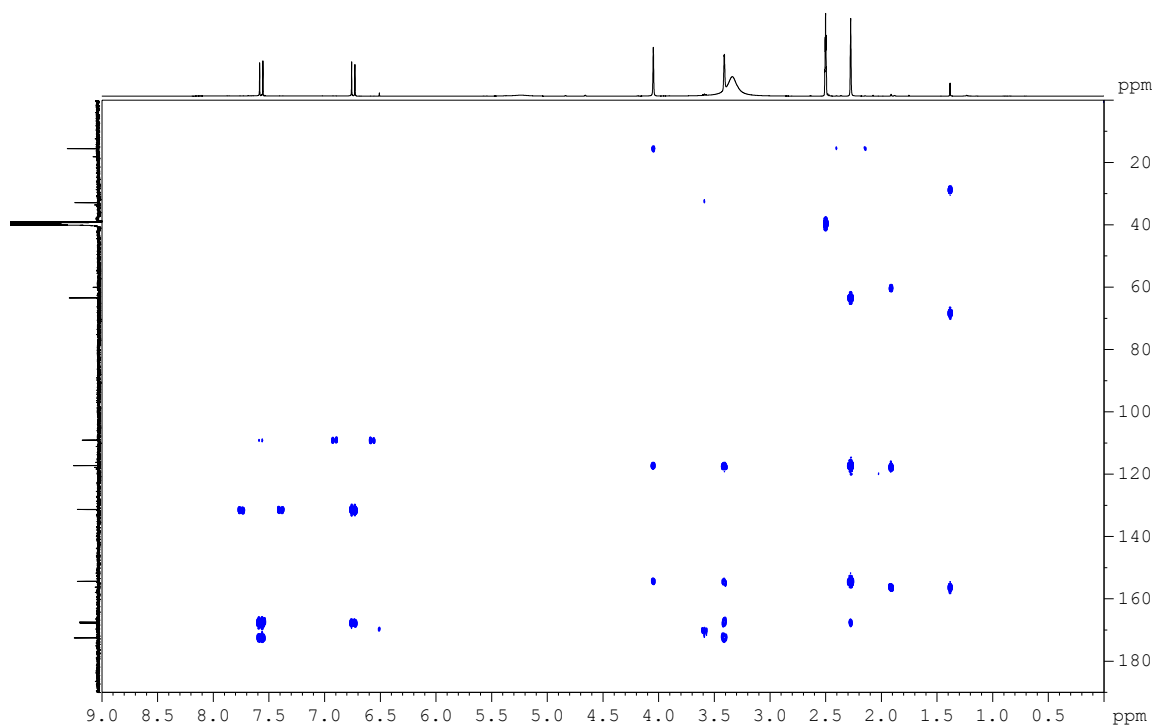

**Figure S25.** HMBC spectrum (500 MHz, DMSO-<sub>6</sub>) of **4**

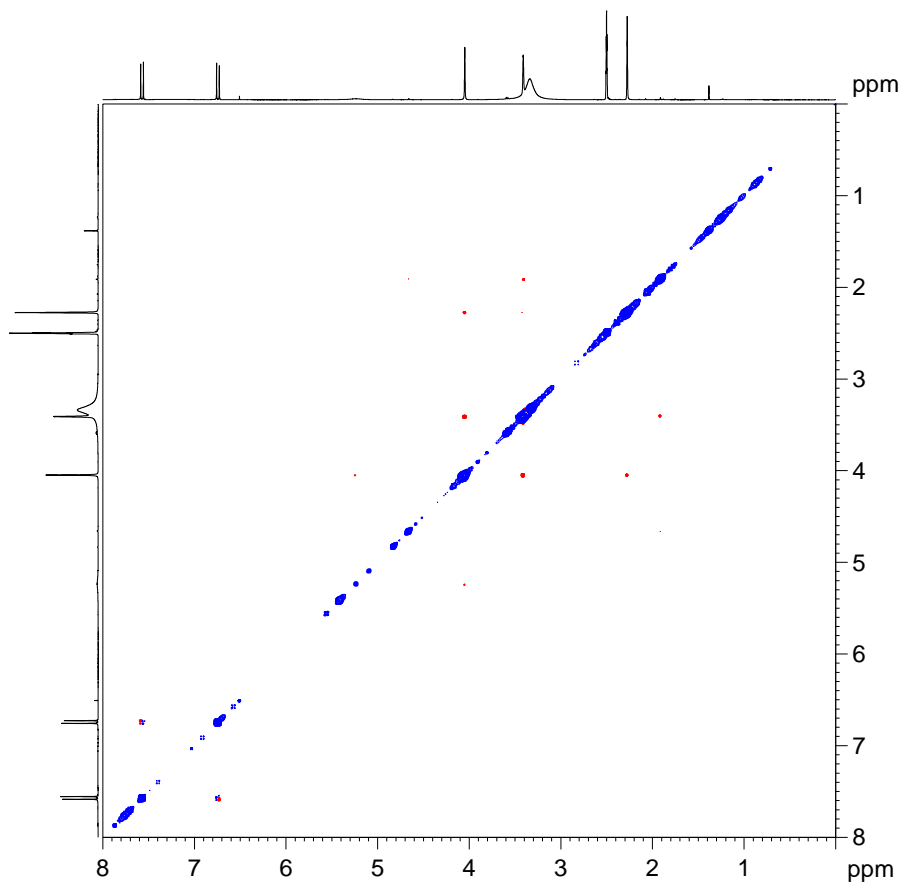

**Figure S26.** ROESY spectrum (500 MHz, DMSO-<sub>6</sub>) of **4**

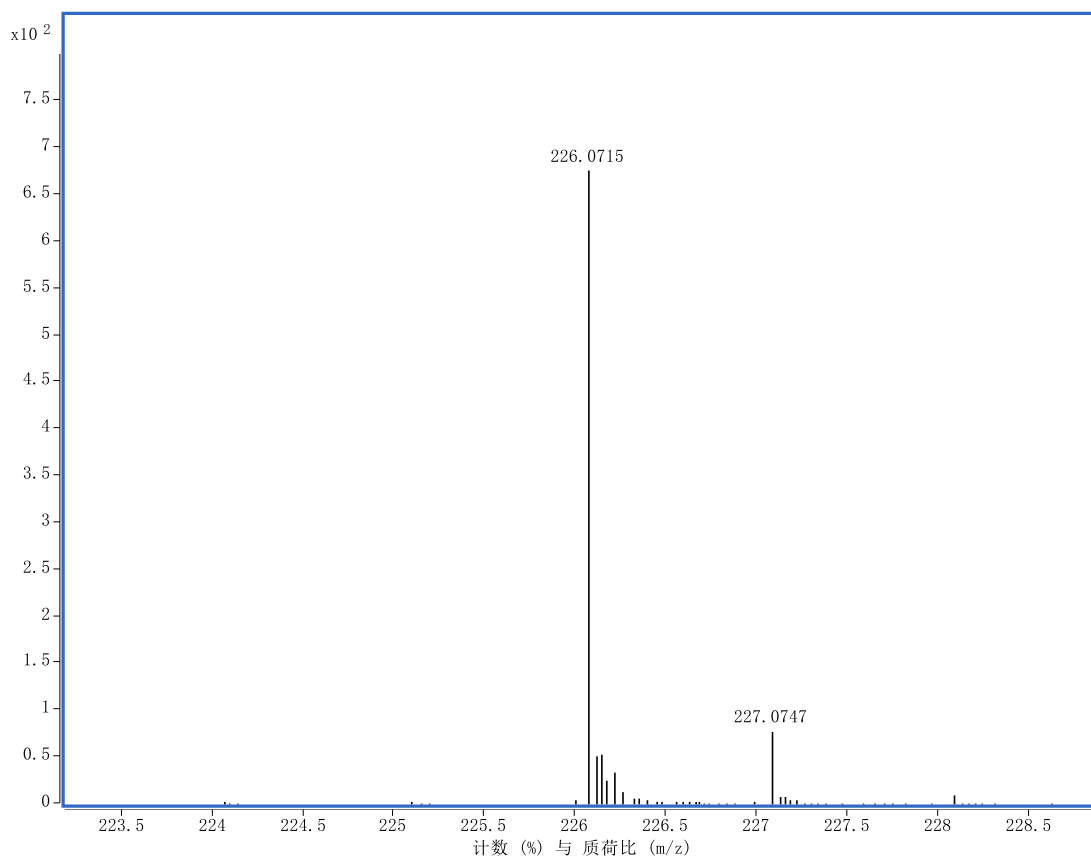

**Figure S27.** HRESIMS spectrum for **5**

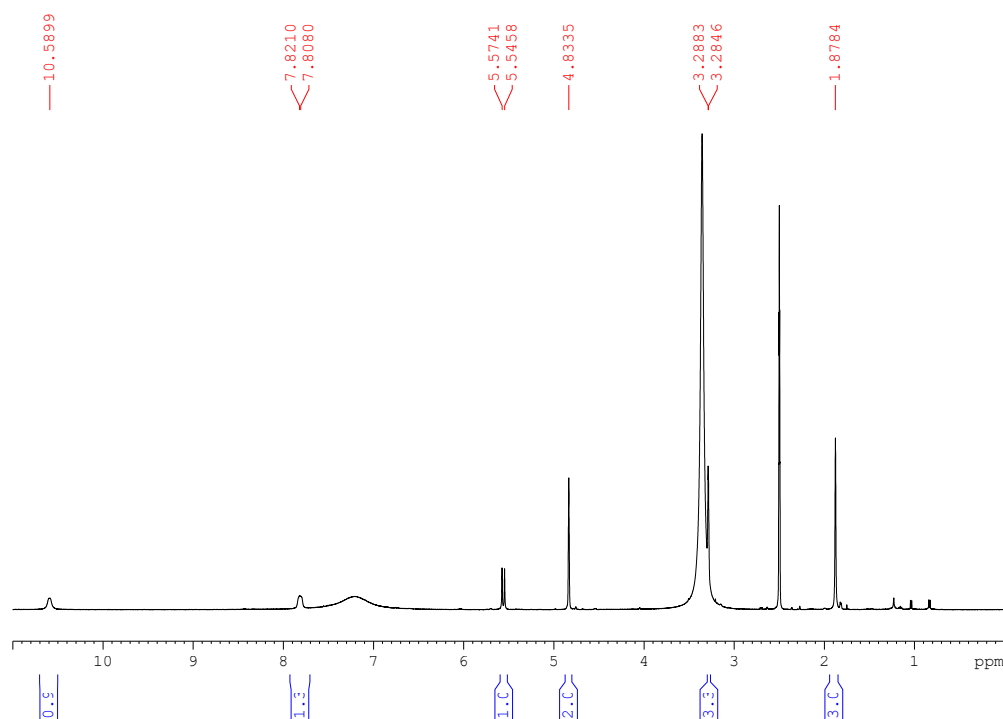

**Figure S28.** <sup>1</sup>H NMR spectrum (500 MHz, DMSO-*d*<sub>6</sub>) of **5**

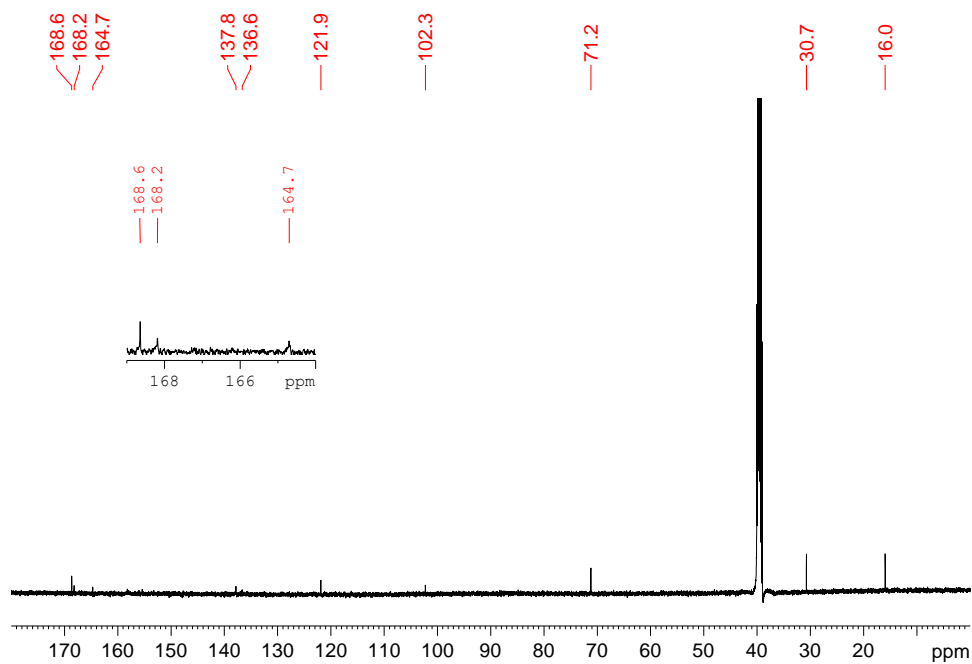

**Figure S29.** <sup>13</sup>C NMR spectrum (125 MHz, DMSO-*d*<sub>6</sub>) of **5**

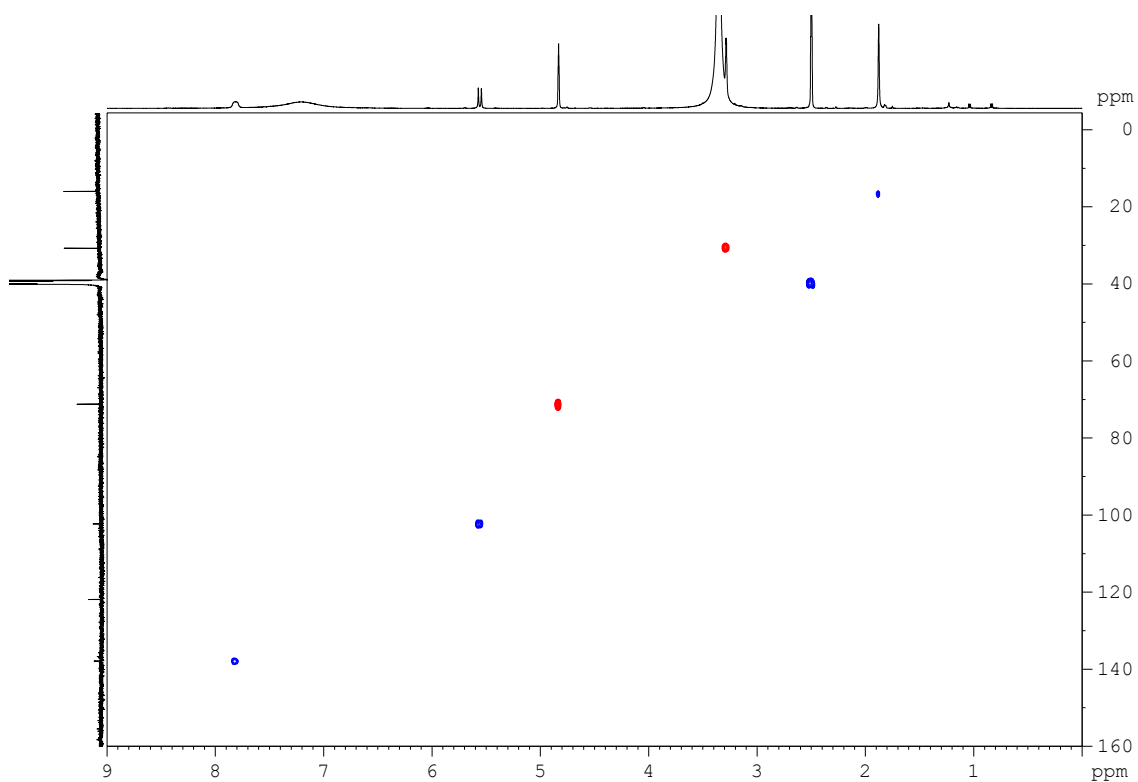

**Figure S30.** HSQC spectrum (500 MHz, DMSO-*d*<sub>6</sub>) of **5**

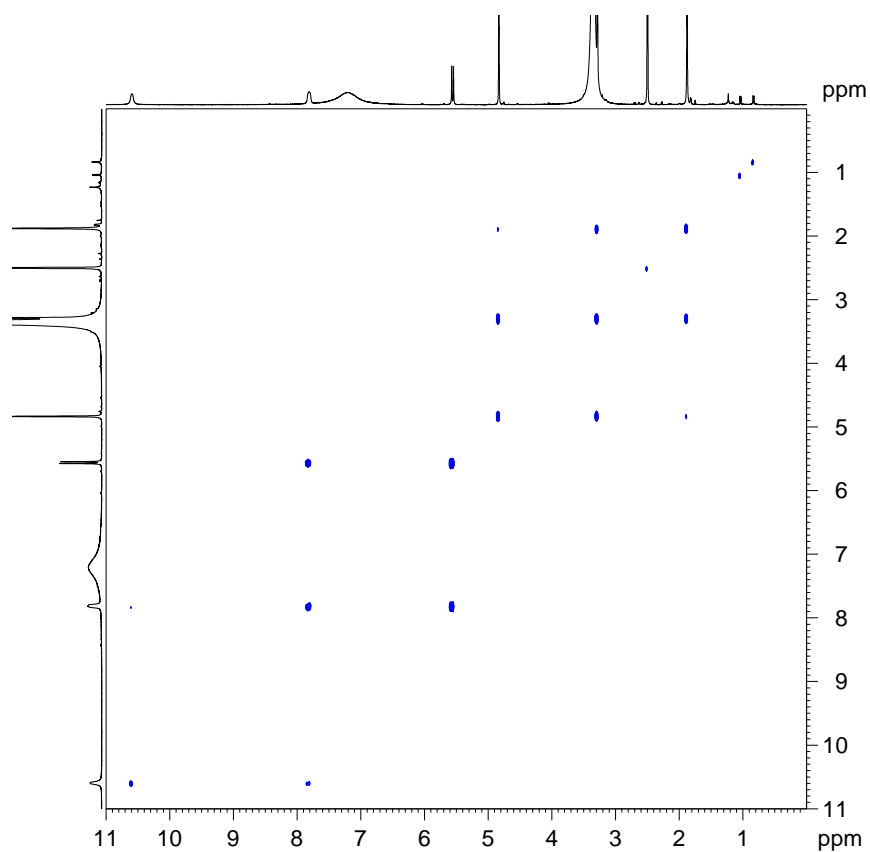

**Figure S31.**  $^1\text{H}$  -  $^1\text{H}$  COSY spectrum (500 MHz,  $\text{DMSO-}d_6$ ) of **5**

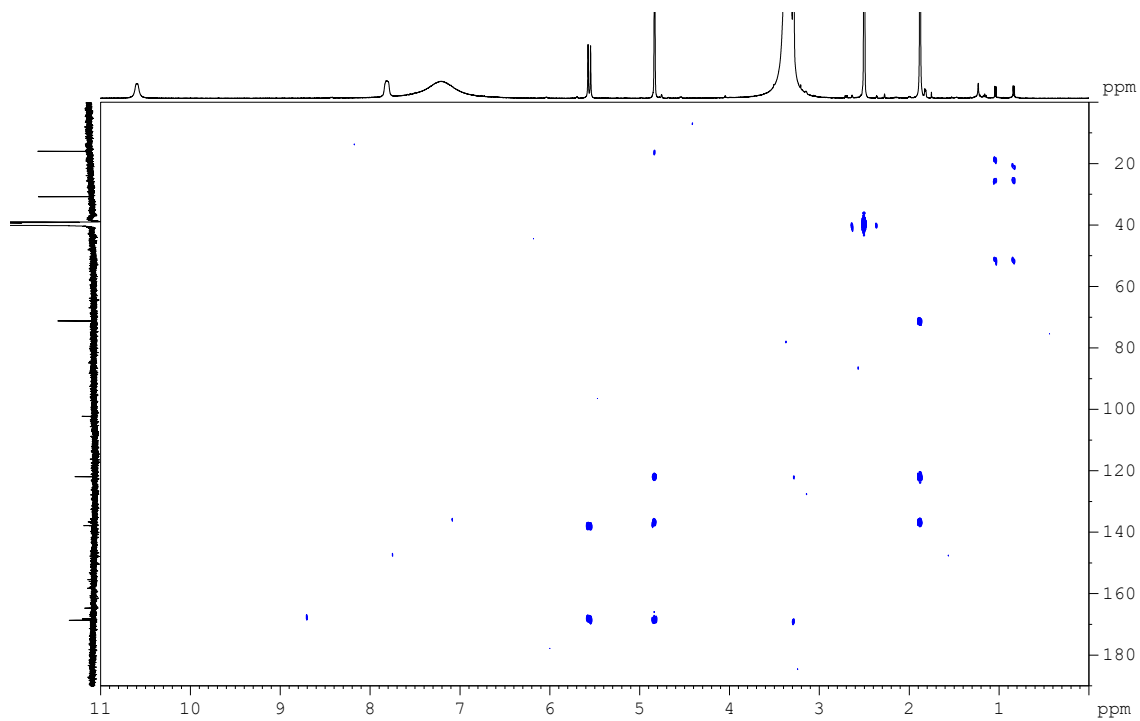

**Figure S32.** HMBC spectrum (500 MHz,  $\text{DMSO-}d_6$ ) of **5**

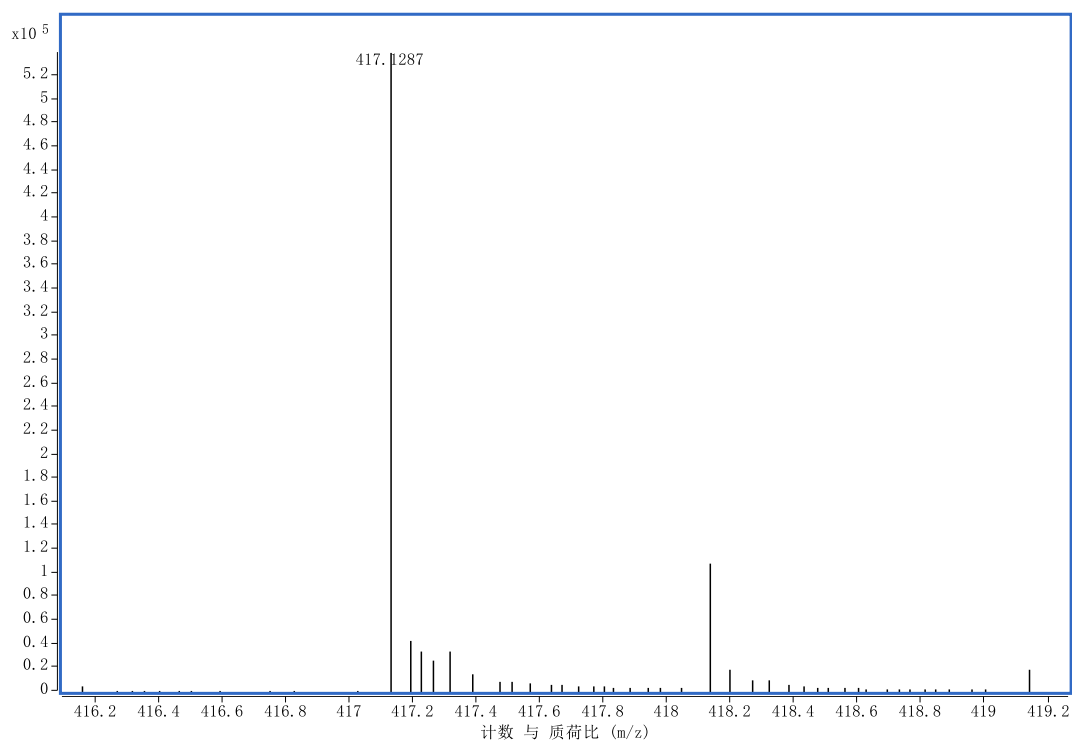

Figure S33. HRESIMS spectrum for 6

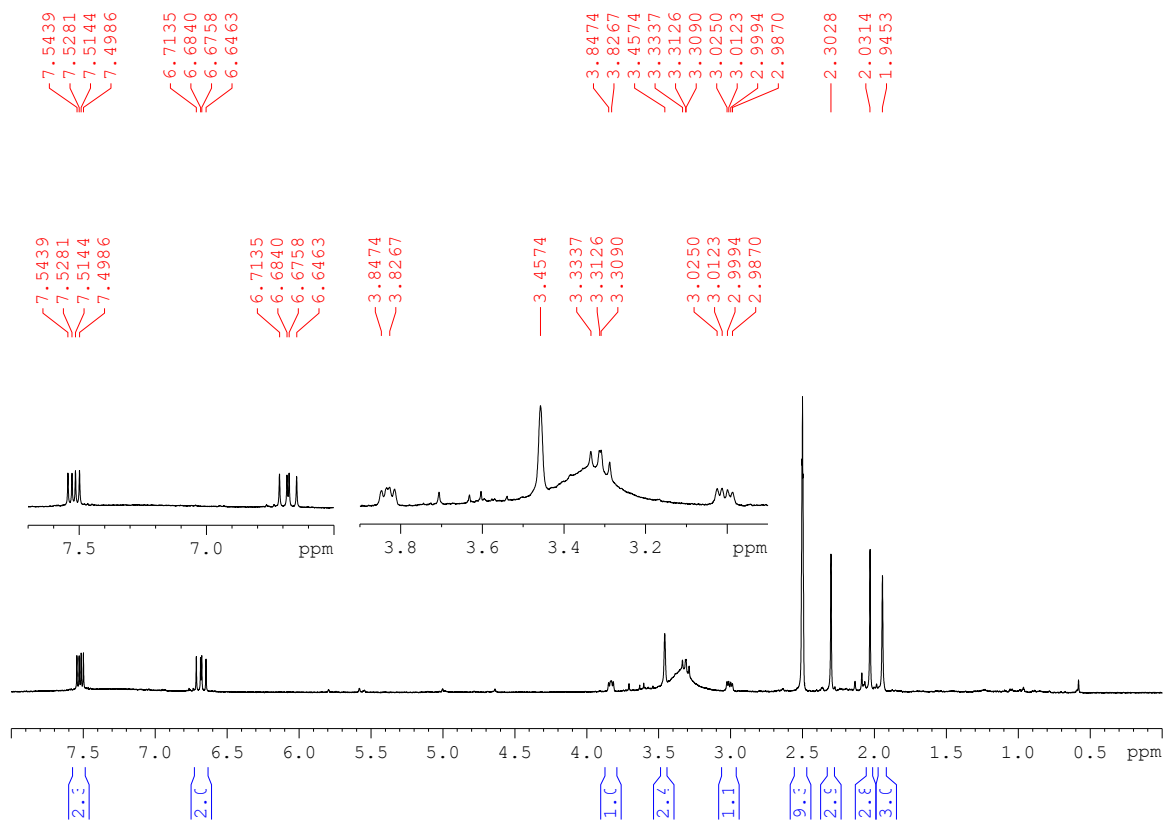Figure S34.  $^1\text{H}$  NMR spectrum (500 MHz,  $\text{DMSO}-d_6$ ) of 6

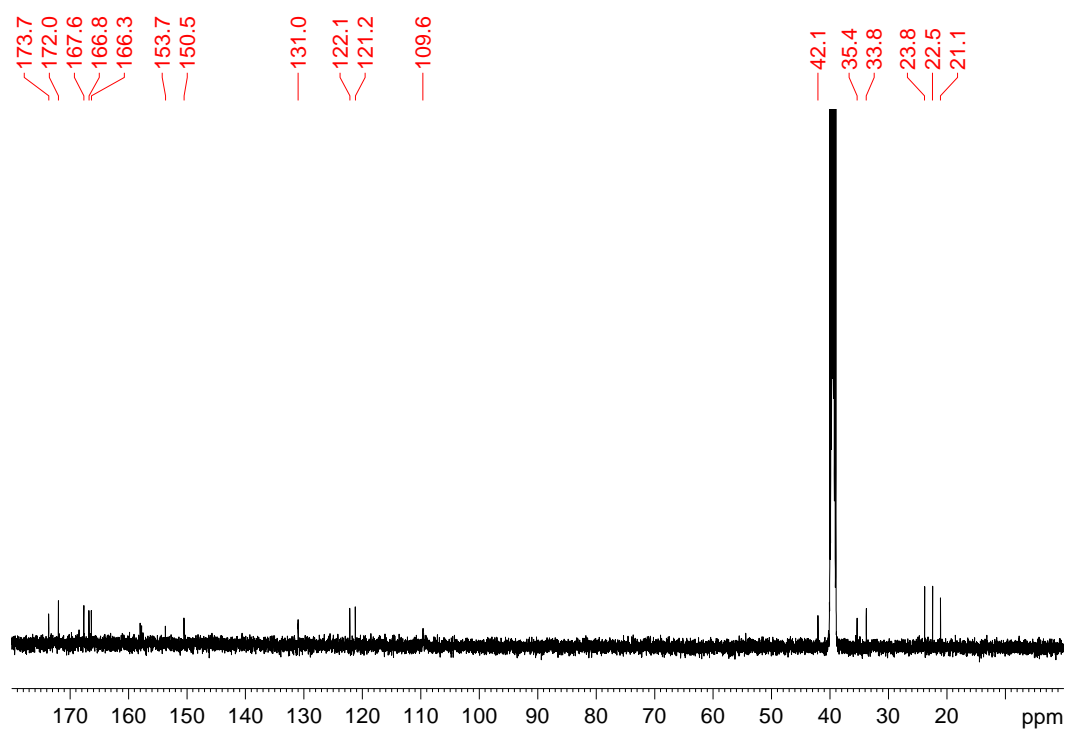

**Figure S35.** <sup>13</sup>C NMR spectrum (125 MHz, DMSO-*d*<sub>6</sub>) of **6**

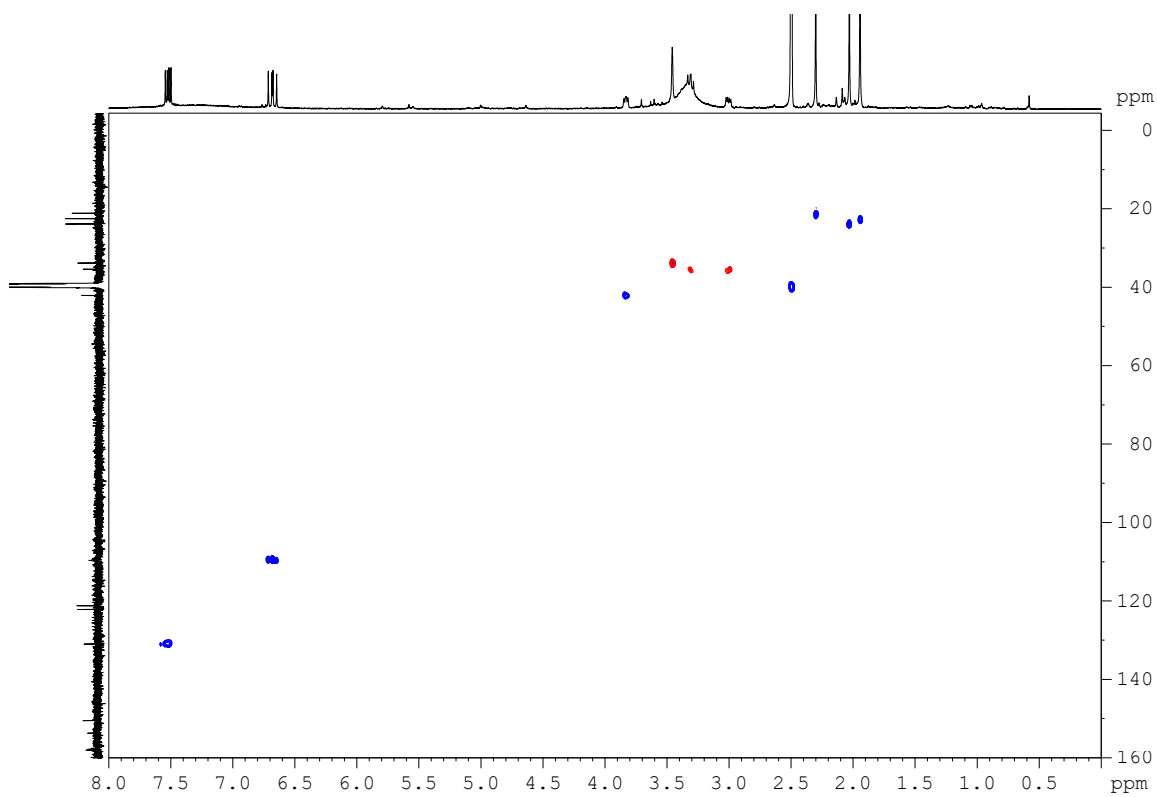

**Figure S36.** HSQC spectrum (500 MHz, DMSO-*d*<sub>6</sub>) of **6**

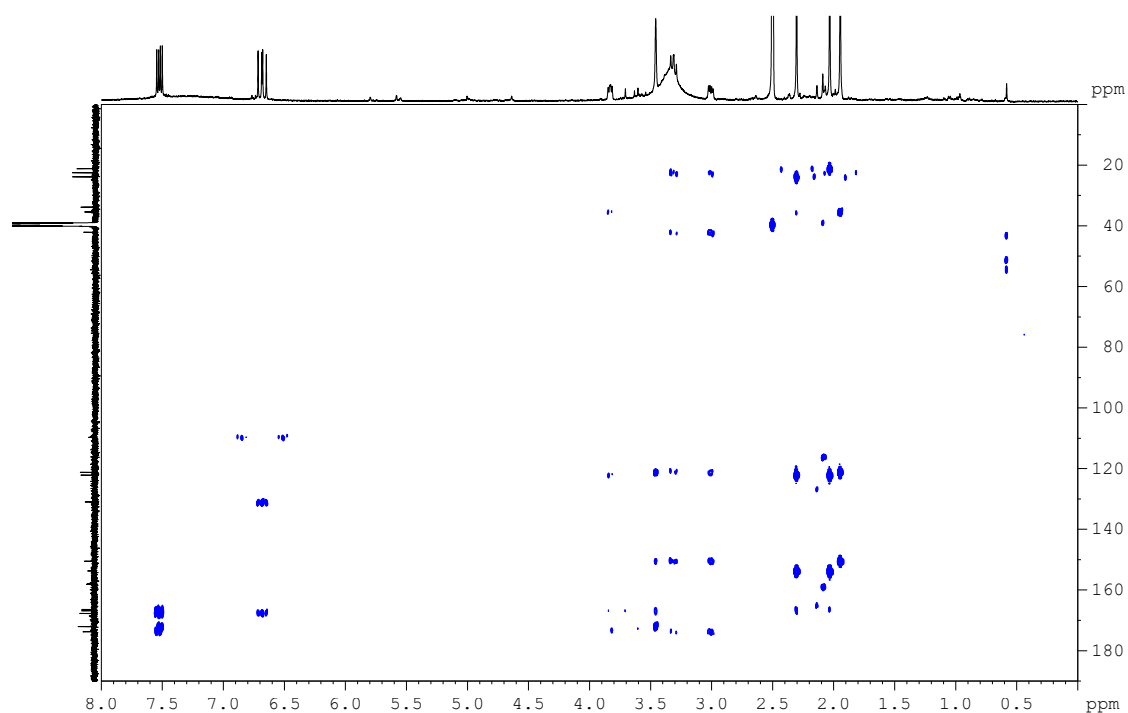

**Figure S37.** HMBC spectrum (500 MHz, DMSO- $d_6$ ) of **6**

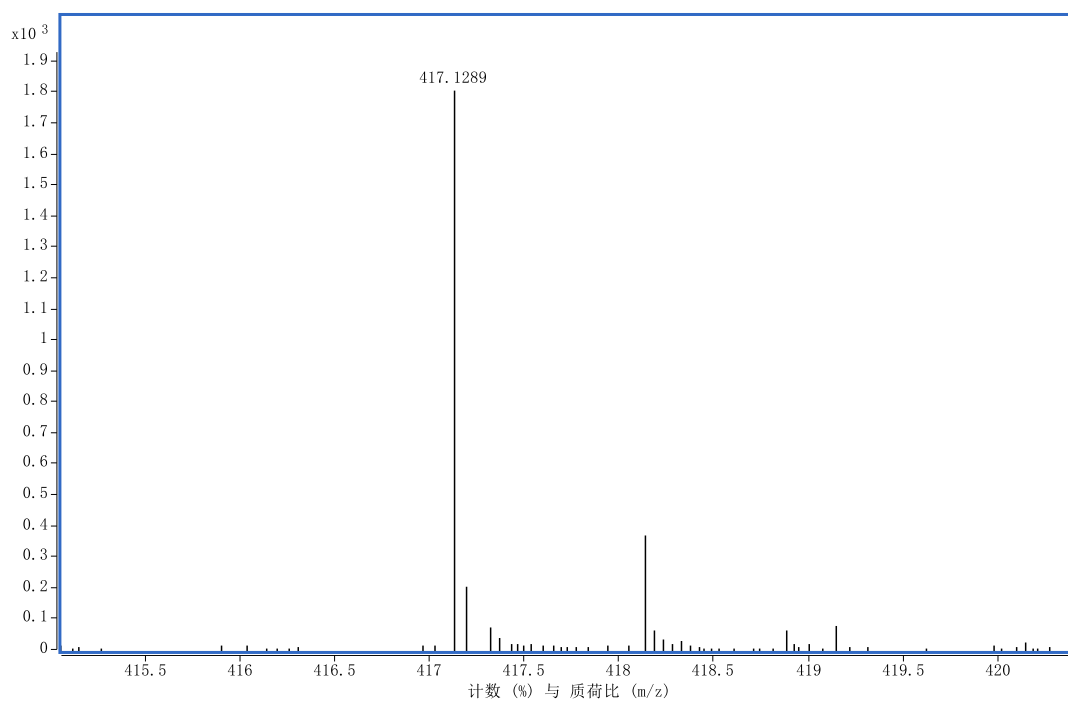

**Figure S38.** HRESIMS spectrum for **7**

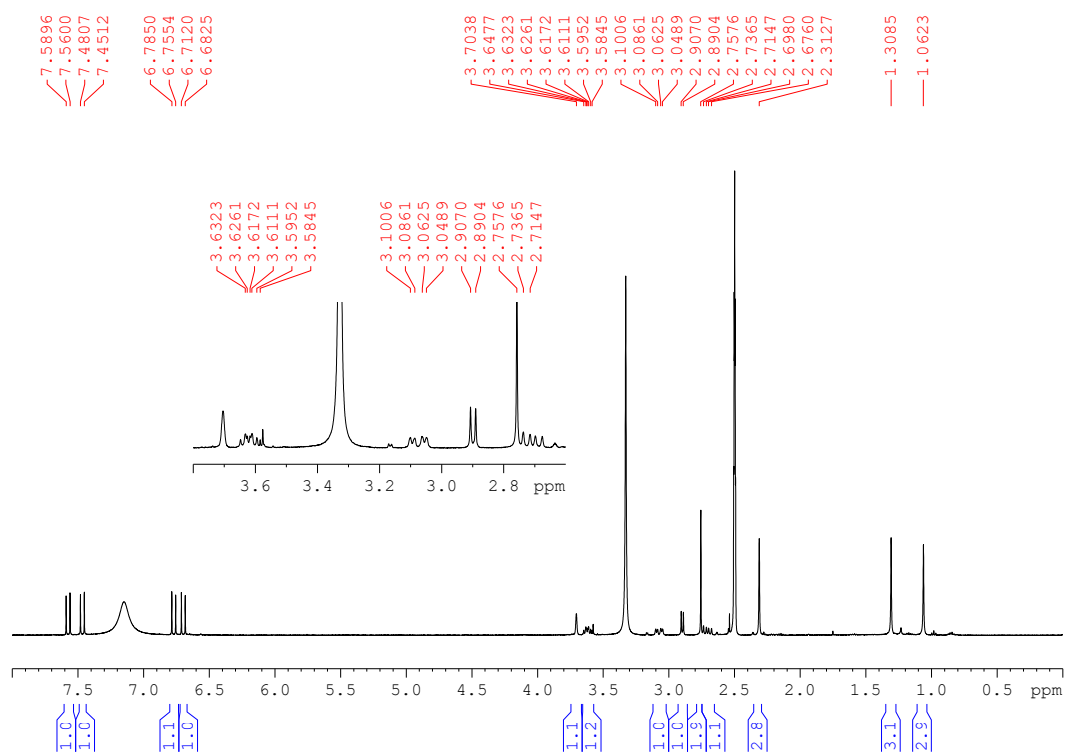

**Figure S39.**  $^1\text{H}$  NMR spectrum (500 MHz,  $\text{DMSO-}d_6$ ) of **7**

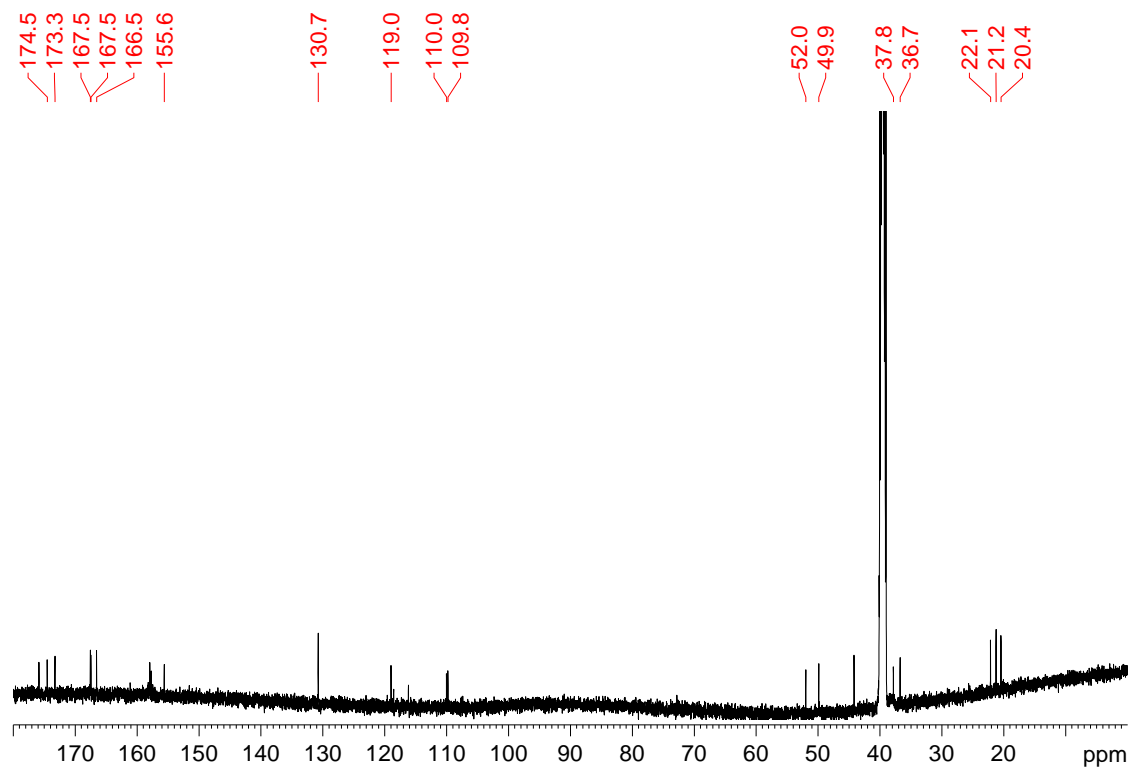

**Figure S40.**  $^{13}\text{C}$  NMR spectrum (125 MHz,  $\text{DMSO-}d_6$ ) of **7**

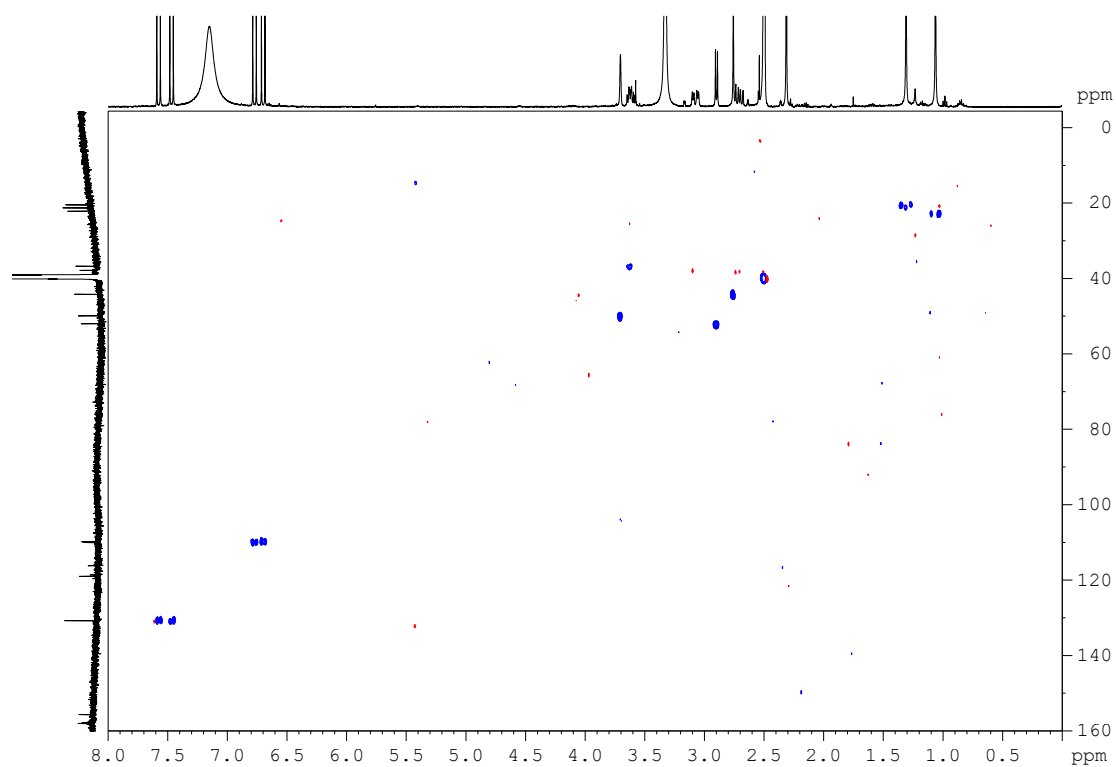

**Figure S41.** HSQC spectrum (500 MHz, DMSO-*d*<sub>6</sub>) of **7**

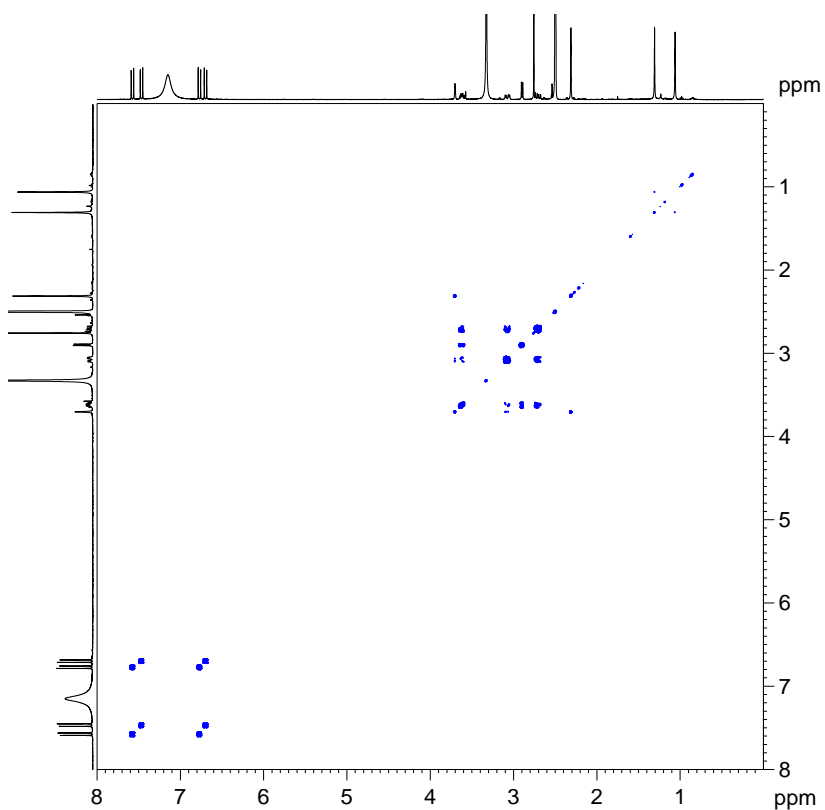

**Figure S42.** <sup>1</sup>H-<sup>1</sup>H COSY spectrum (500 MHz, DMSO-*d*<sub>6</sub>) of **12**

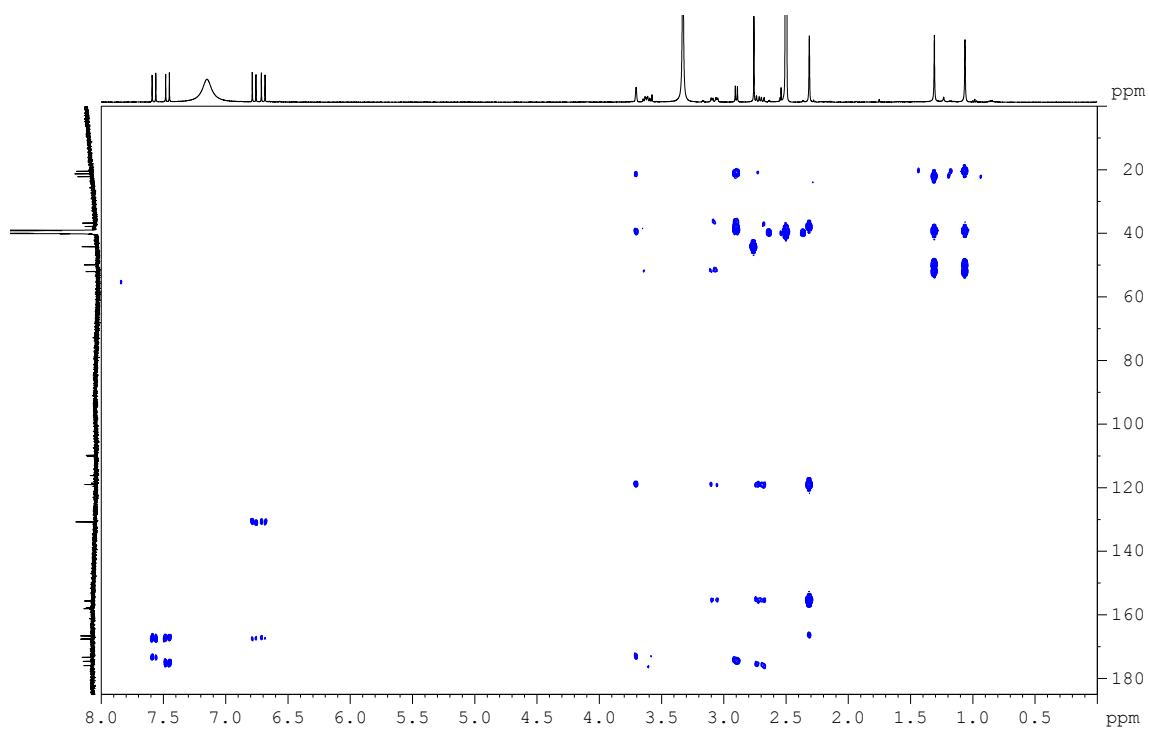

**Figure S43.** HMBC spectrum (500 MHz, DMSO- $d_6$ ) of **7**

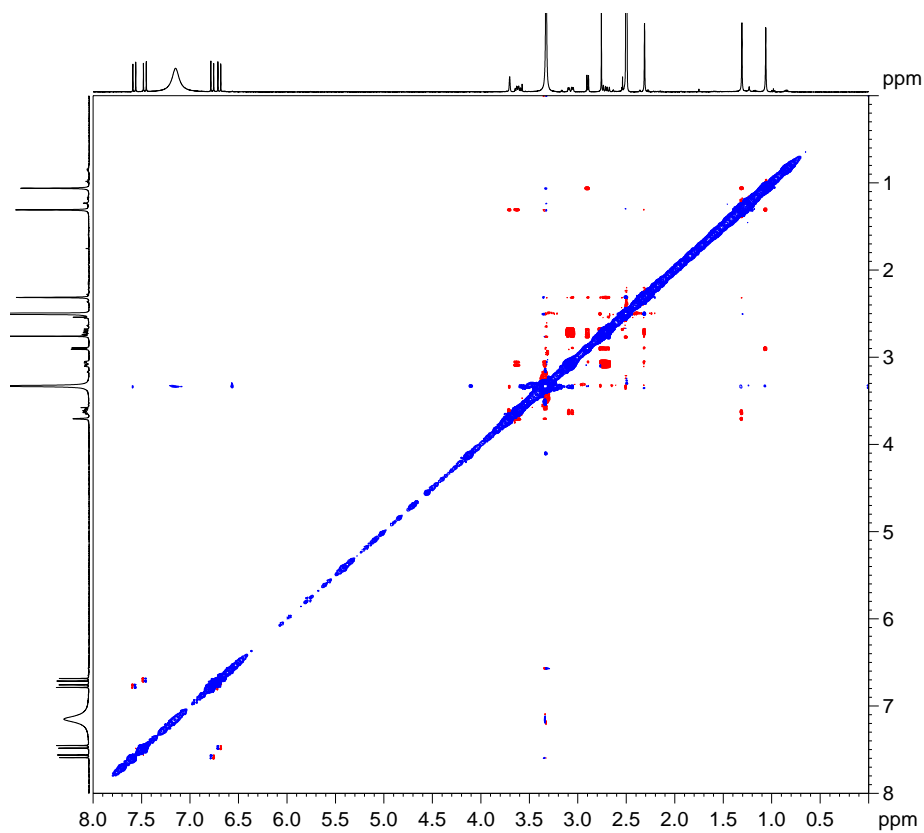

**Figure S44.** ROESY spectrum (500 MHz, DMSO- $d_6$ ) of **7**

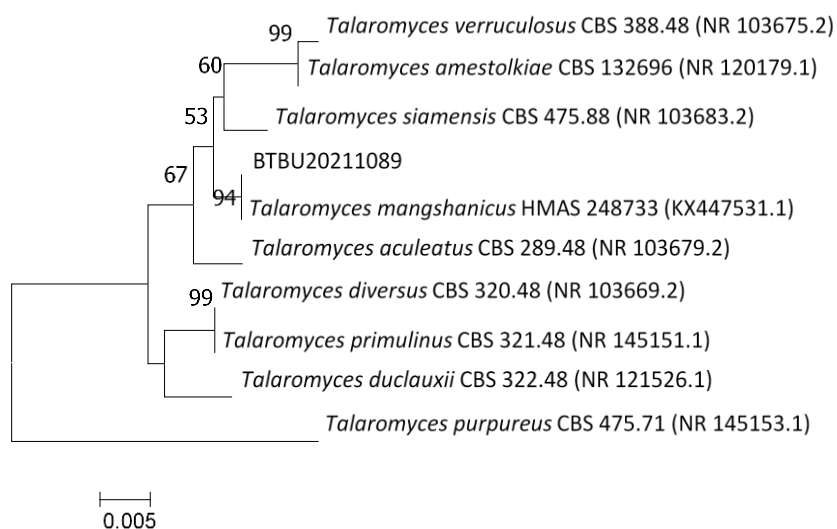

**Figure S45.** Neighbor-joining phylogenetic tree of BTBU20211089 and its most related type strains based on internal transcribed spacer region (ITS) from NCBI ITS database. Numbers at nodes indicate levels of bootstrap support (%) based on a neighbor joining analysis of 1,000 resampled datasets; only values >50 % are given. NCBI accession numbers are given in parentheses. Bar 0.005 nucleotide substitutions per site.
